# Supplementary material
Source: PubMed Central journal article supplement (PMC3166533)
Supplement: NIHMS317532-supplement-supporting_mat.pdf [file NIHMS317532-supplement-supporting_mat.pdf]

## SUPPLEMENTARY DATA for

### The Trp-cage: Optimizing the Stability of a Globular Miniprotein

Bipasha Barua, Jasper C. Lin, D. Victoria Williams, Phillip Kummler, Jonathan Neidigh and Niels H. Andersen \*

Colour versions of figures in the article text.

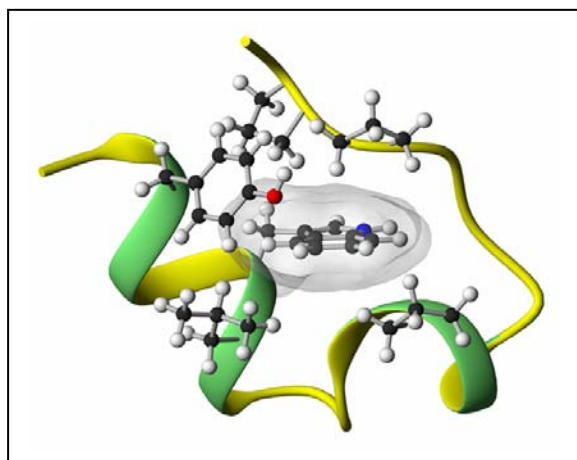

**Fig. 1.** The Trp-cage fold showing the secondary structure features and the buried Trp sidechain as well as the residues that shield the Trp indole ring from solvent exposure.

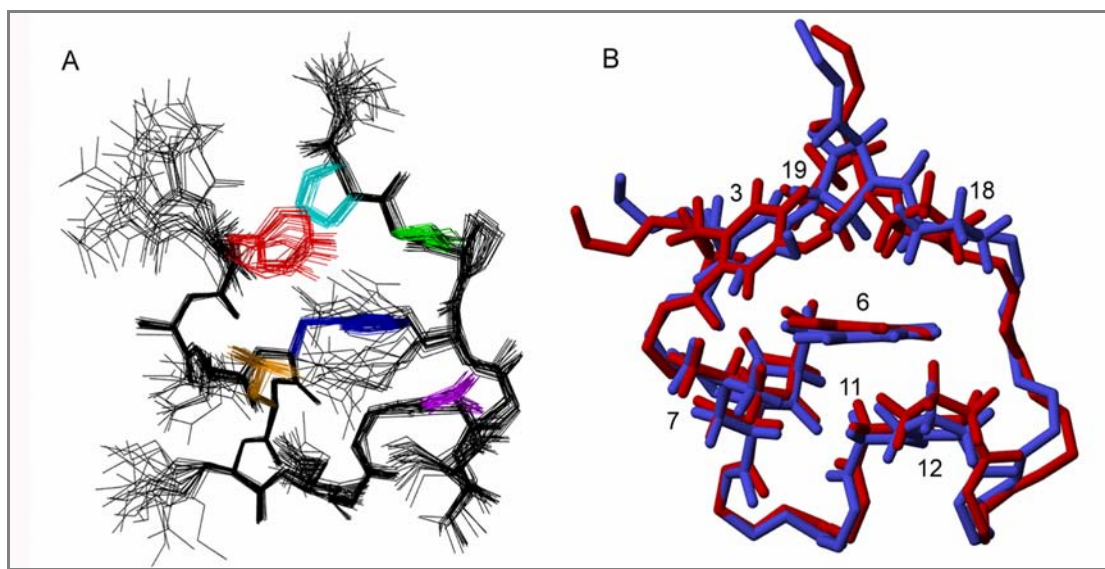

**Fig. 4.** Trp-cage NMR structure ensembles: (a) The TC10b structure ensemble (28 structures): heavy atoms are displayed for all residue sidechains and the backbone, the hydrophobic cluster residues are shown in color -- Tyr<sup>3</sup> (red), Trp<sup>6</sup> (blue), Leu<sup>7</sup> (yellow), Pro<sup>12</sup> (magenta), Pro<sup>18</sup> (green), and Pro<sup>19</sup> (cyan). (b) An overlay of one member each of the TC10b (blue) and TC5b (red) structure ensembles. All atoms are displayed for Tyr<sup>3</sup>, Trp<sup>6</sup>, Leu<sup>7</sup>, Pro<sup>12</sup>, Pro<sup>18</sup>, and Pro<sup>19</sup> with only N, CA, C' shown for the remaining residues.

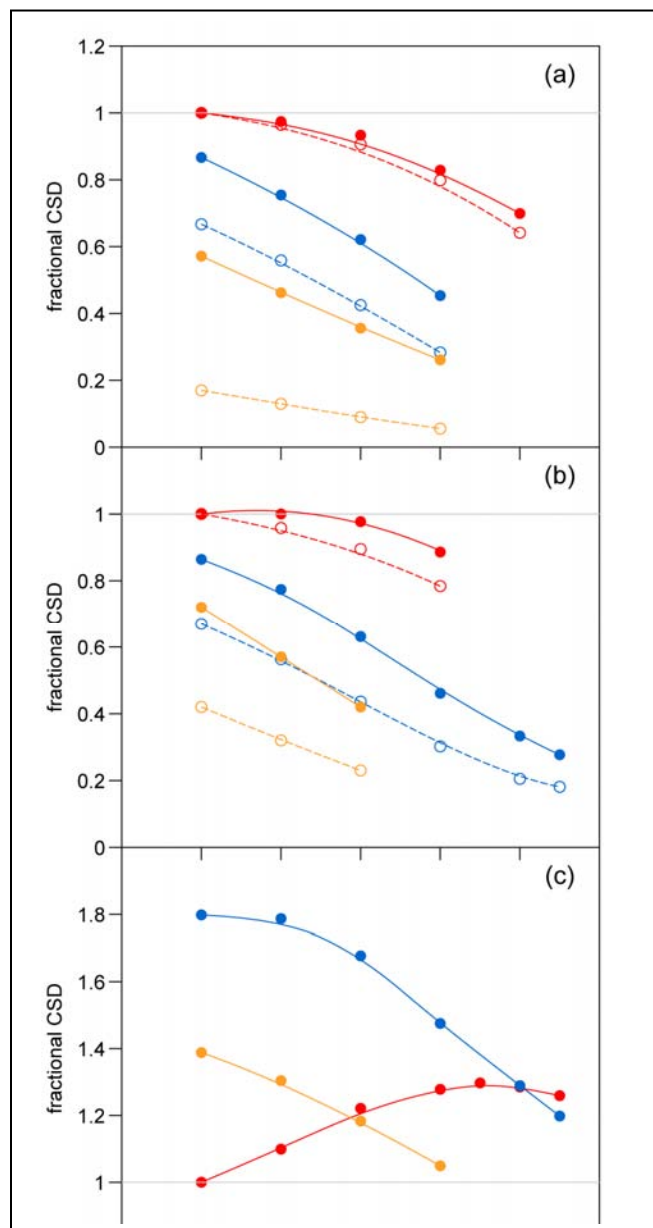

**Fig. 6.** Differential melting effects upon destabilization of the Trp-cage: fractional CSDs versus  $T$  ( $^{\circ}\text{C}$ ) for TC10b (red) and its S14A- (blue) and P19A-mutants (orange) -- panel (a) plots the “cage” (dashed lines) and “helix” (solid line) measures of folding, panel (b) plots the G11 $\alpha$ 2 (dashed lines) and G11 $\alpha$ 3 (solid line) CSDs, panel (c) shows the P12 $\delta$ 3 CSDs, TC10b at 7  $^{\circ}\text{C}$  is the calibration standard for CSD = 1.0 in all panels. The P12 $\delta$ 3 CSDs (upfield) for the less stable systems are larger than those observed for TC10b. In the case of the P19A mutant, the only cage measure available for panel (a) are the P18 $\alpha$  and  $\beta$ 3 CSDs.

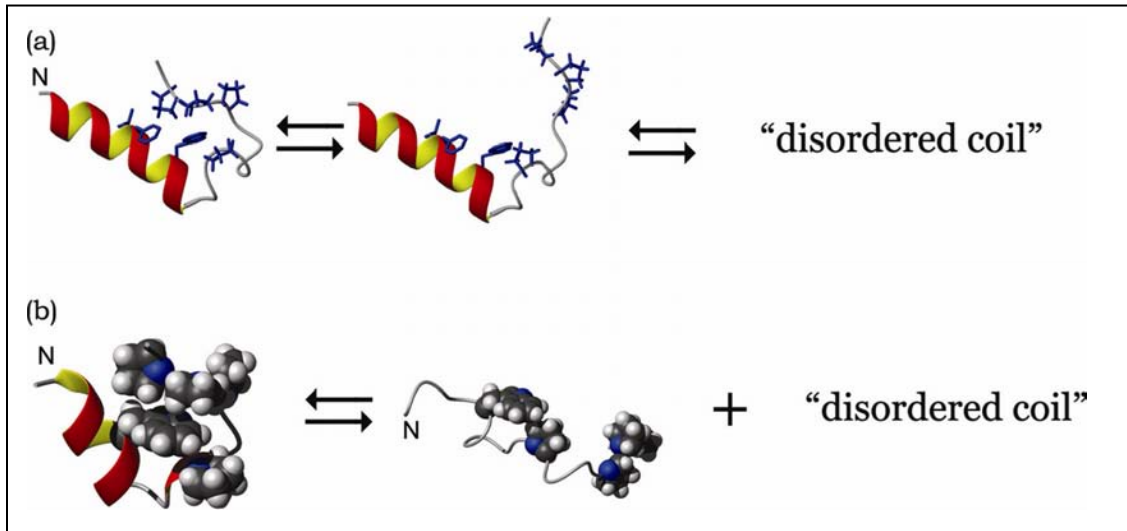

**Fig. 7.** Unfolding (melting) scenarios for Trp-cages with different degrees of intrinsic helix stability: (a) Trp-cage formation as Pro<sup>17,18,19</sup> docking onto a stable helix, (b) Trp-cage melting producing an unfolded ensemble retaining a measurable population of a residual hydrophobic cluster, a "half-cage" structure.

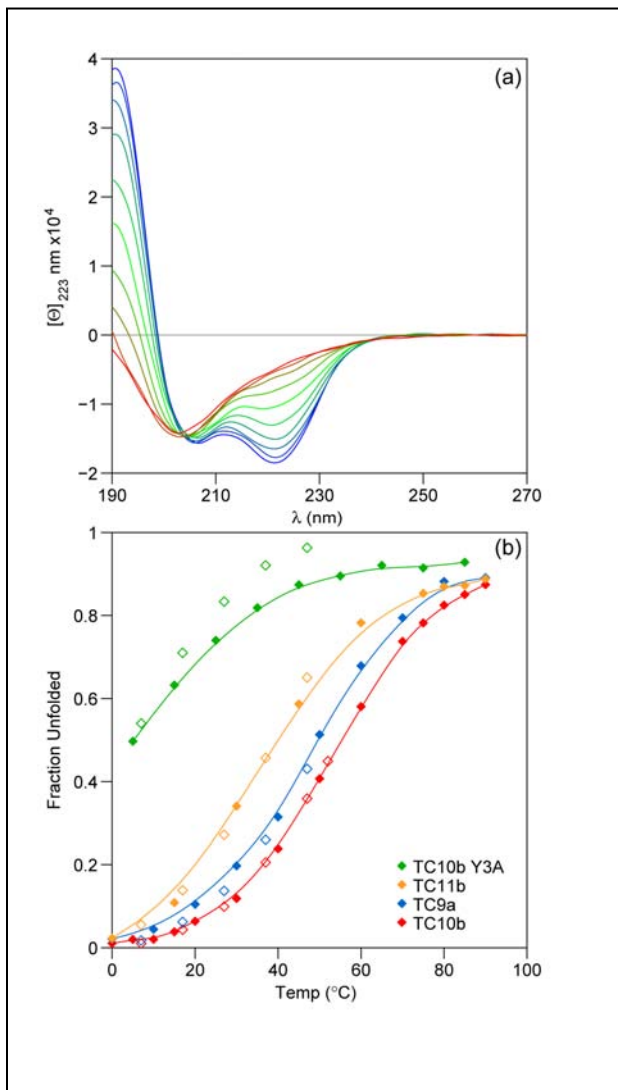

**Fig. 8.** (a) The temperature dependence of the CD spectrum of TC10b at pH 7, traces are shown for every 10° increment from 0 to 90 °C. (b) Melting curves ( $\chi_U$  versus  $T$ ) for TC10b and some of its single site mutants. To illustrate the agreement between chemical shift and CD melts we have superimposed  $\chi_U$  values from "cage CSDs" as open symbols on the plots. When the cage is substantially destabilized, illustrated here by Y3A-TC10b, some residual helicity remains after the cage structure melts.

## SUPPLEMENTARY DATA AND DISCUSSION.

### **The Trp-cage displays the same chemical shift deviations over a wide range of mutants.**

At this point mutations at all positions in the original sequence, except the three glycines, have been examined. Of those retaining the Trp residue, all but five adopt the Trp-cage fold as the predominant conformation in water. There is a remarkable consistency in the chemical shifts (Table S1) observed for these species under conditions that favor folding (pH 6 – 7, 280K). All of the large structuring shifts, due to ring-current effects in the hydrophobic core, that are used to measure the extent of folding in the Trp-cage appear in Table S1. The shifts are given as chemical shift deviations ( $CSD = \delta_{obs} - \delta_{rc}$ , where  $\delta_{obs}$  is the observed chemical shift and  $\delta_{rc}$  is a reference random coil chemical shift; the random coil shifts employed are also listed, with the exception of Gly<sup>11</sup> these are the values produced by our current automated CSD computation algorithm (Fesinmeyer *et al.*, 2004). From Table S1, it is apparent that we had nearly achieved the fully folded shift values at the stage of TC5b. Only minor increases in structuring shifts at 280K are observed as the fold stability is increased by mutation or by the addition of TFE. Consistent with this, a recent report from another lab (Naduthambi and Zondlo, 2006) indicates CSDs of -3.58 and +0.51 for G11H $\alpha$ 2 and R16H $\alpha$ , respectively, in a stabilized Trp-cage. If we account for the unfolded fraction of TC5b present (estimated from the NH protection data), the sum of the structuring shifts for the folded state of TC5b is greater than 95% of the sum of maximum CSDs at each position observed in higher melting constructs in Table S1. We view this as evidence that the less stable TC5b structure does not show dramatically enhanced structural fluxionality in the folded state.

As additional evidence for a common structure we document that the destabilization of a Trp-cage fold by adjusting the pH from 7 to 2.5, and thus eliminating or greatly weakening the H-bonded salt bridge between Asp<sup>9</sup> and Arg<sup>16</sup> results in changes in the chemical shift deviation melts (Figure S1) that are entirely comparable to those observed by mutational destabilization (Figure 2).

Table S1. Chemical shift deviations for representative Trp-cage sequences at 280 K. <sup>(a)</sup>

| Sequence                             |                     |                                     | CSDs        |                              |              |                     |             | 19 $\delta$ 3, 19 $\delta$ 2 |                      |
|--------------------------------------|---------------------|-------------------------------------|-------------|------------------------------|--------------|---------------------|-------------|------------------------------|----------------------|
|                                      |                     |                                     | 7 $\alpha$  | 11 $\alpha$ 2 <sup>(b)</sup> | 12 $\beta$ 3 | 16 $\alpha$         | 18 $\alpha$ |                              |                      |
| pH 6 – 7 buffer <sup>(c)</sup> -     |                     |                                     |             |                              |              |                     |             |                              |                      |
| Random coil reference chemical shift |                     |                                     | 4.226       | 4.02                         | 2.27         | 4.622               | 4.69        | 2.29                         | 3.74, 3.59           |
| <b>TC5b</b>                          | NLYIQWLKD           | GGPSSGRPPPS <sup>(d)</sup>          | -0.78       | -3.29                        | 0.25         | 0.41                | -2.18       | -1.95                        | -0.56, -0.63         |
|                                      | NLY <b>A</b> QWLKD  | GGPSSGRPPPS                         | -0.81       | -3.27                        | 0.26         | 0.44                | -2.20       | -1.98                        | -0.59, -0.66         |
|                                      | DLY <b>A</b> QWLKD  | GGPSSGRPPPS                         | -0.82       | -3.35                        | 0.26         | 0.46                | -2.25       | -2.03                        | -0.62, -0.66         |
| <b>AcA</b>                           | AYAQWLKD            | GGPSSGRPPPS                         | -0.83       | -3.41                        | 0.27         | 0.47                | -2.30       | -2.11                        | -0.57, -0.67         |
|                                      | N <b>A</b> YAQWLKD  | GGPSSGRPPPS                         | -0.83       | -3.35                        | 0.26         | 0.45                | -2.28       | -2.06                        | -0.57, -0.66         |
|                                      | <b>TC10b</b>        | DAYAQWLKD                           | GGPSSGRPPPS | -0.84                        | -3.37        | 0.27                | 0.46        | -2.29                        | -2.07                |
|                                      | DAY <b>U</b> QWLKD  | GGPSSGRPPPS                         | -0.79       | -3.31                        | 0.27         | 0.46                | -2.24       | -2.01                        | -0.58, -0.59         |
|                                      | NA <b>U</b> YUQWLKD | GGPSSGRPPPS                         | -0.78       | -3.42                        | 0.27         | 0.48                | -2.33       | -2.12                        | -0.55, -0.63         |
|                                      | NAYA <b>A</b> WLKD  | GGPSSGRPPPS <sup>(e)</sup>          | -0.80       | <b>-3.04</b>                 | 0.24         | <b>0.39</b>         | -2.11       | <b>-1.86</b>                 | -0.56, -0.61         |
|                                      | NAYAQWL <b>A</b> D  | GGPSSGRPPPS                         | -0.86       | -3.35                        | 0.27         | 0.46                | -2.30       | -2.08                        | -0.57, -0.66         |
|                                      | NAYAQWLKD           | GGP <b>S</b> TGRPPPS <sup>(e)</sup> | -0.84       | -3.21                        | 0.24         | <b>0.29</b>         | -2.20       | <b>-1.76</b>                 | -0.58, -0.67         |
|                                      | DAYAQWLKD           | GGPSSGR <b>A</b> PPS                | -0.84       | -3.27                        | 0.26         | 0.48 <sup>(f)</sup> | -2.10       | -2.08                        | <b>-0.51</b> , -0.62 |
|                                      | DAYAQWLKD           | GGPSSGR <b>P</b> APS                | -0.84       | -3.41                        | 0.26         | 0.46                | -2.60       | n. a.                        | -0.60, -0.75         |
|                                      | DAYAQWLKD           | GGPSSGRPP <b>P</b> NH <sub>2</sub>  | -0.84       | -3.32                        | 0.27         | 0.44                | -2.23       | -2.06                        | -0.58, -0.63         |
| <b>GAAAAA</b>                        | AYAQWLKD            | GGPSSGRPPPS                         | -0.84       | -3.42                        | 0.27         | 0.47                | -2.32       | -2.08                        | -0.61, -0.67         |
| 30% TFE <sup>(g)</sup> -             |                     |                                     |             |                              |              |                     |             |                              |                      |
| Random coil reference chemical shift |                     |                                     | 4.261       | 4.055                        | 2.27         | 4.657               | 4.723       | 2.29                         | 3.74, 3.59           |
| <b>TC5b</b>                          | NLYIQWLKD           | GGPSSGRPPPS                         | -0.78       | -3.20                        | 0.24         | 0.44                | -2.12       | -1.95                        | -0.59, -0.67         |
|                                      | NLY <b>A</b> QWLKD  | GGPSSGRPPPS                         | -0.75       | -3.35                        | 0.26         | 0.47                | -2.20       | -2.04                        | -0.64, -0.72         |
|                                      | D <b>A</b> YAQWLKD  | GGPSSGRPPPS                         | -0.77       | -3.46                        | 0.26         | 0.50                | -2.30       | -2.11                        | -0.61, -0.70         |
| <b>AcA</b>                           | AYAQWLKD            | GGPSSGRPPPS                         | -0.78       | -3.46                        | 0.26         | 0.49                | -2.32       | -2.12                        | -0.59, -0.71         |
|                                      | NAYAQWLKD           | GGP <b>S</b> TGRPPPS                | -0.80       | -3.31                        | 0.23         | <b>0.35</b>         | -2.21       | <b>-1.89</b>                 | -0.56, -0.64         |
|                                      | DAYAQWLKD           | GGPSSGR <b>A</b> PPS                | -0.79       | -3.44                        | 0.27         | 0.53 <sup>(f)</sup> | -2.16       | -2.14                        | -0.55, -0.68         |

<sup>(a)</sup> The reference shift values employed are shown in the first row. Bold values in the body of the table highlight CSDs that are significantly smaller than the largest values observed; these imply fraction folded values ( $\chi_F$ ) less than 0.98. Unusually large shift are italicized.

<sup>(b)</sup> The CSD of the other Gly H $\alpha$  (11H $\alpha$ 3) is significantly smaller, see text: the range is -0.87 to -1.02 for the systems listed in this Table.

<sup>(c)</sup> In most cases the pH was between 6.6 and 7 and spectral data was collected at 280K with 5% D<sub>2</sub>O included as the lock signal. In purely aqueous buffers, the fold stability decreases as the pH is lowered to or beyond 4.9.

<sup>(d)</sup> The data for TC5b is pH\* = 6 in 98+ % D<sub>2</sub>O. The ring current shifts are slightly larger (by 3 – 9 %) in D<sub>2</sub>O versus H<sub>2</sub>O.

<sup>(e)</sup> Other data for these two analogs also suggest that  $\chi_F$  for these two analogs is less than 0.96 under the strictly aqueous conditions at the lowest temperature examined.

<sup>(f)</sup> An adjustment in the R16 $\alpha$  reference shift (-0.28 ppm), reflecting the Pro to Ala mutation in the following residue, has been included in the CSD calculation.

<sup>(g)</sup> These solutions were prepared by adding TFE to aqueous solutions at pH 6.6. The effective pH is estimated to be about 5.8.

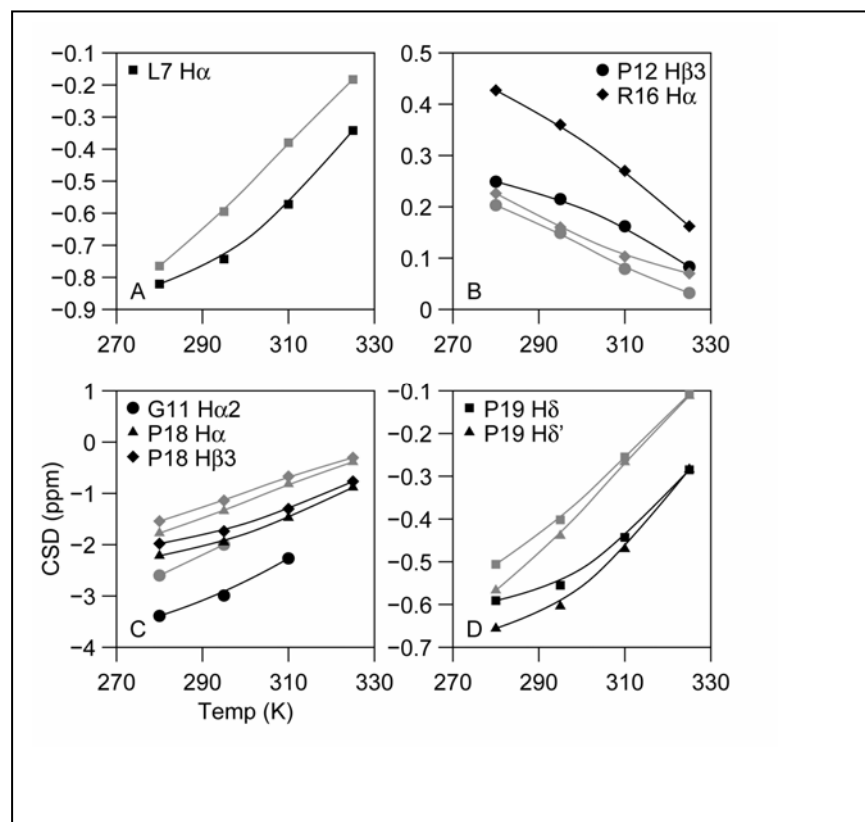

**Figure S1.** Plots of chemical shift deviations (CSDs, the  $^1\text{H}$  sites are labeled on the panels) versus temperature for TC8a at pH 7 (optimum stability, black) and at pH 2.5 (grey lines and symbols). The lines through the data are polynomial fits with no theoretical significance. The pH effect on stability is due almost exclusively to the loss of the salt-bridge upon protonation of Asp<sup>9</sup>. The format is the same as in textual Figure 2.

### Structural Characterization of TC10b

The NMR structure ensemble for TC10b was generated from 186 NOE distances, including 28 long-range ( $i/i+n$ ,  $n>4$ ) constraints. The NOE intensities were obtained directly from the NOESY spectra and these were converted to distances by an automated program, DIS (Fesinmeyer, 2005), which also calculates the allowed ranges, from  $d - d_+$  to  $d + d_+$ , using the relation  $d = A * i^B$ , where  $d$  is the distance in Å,  $i$  is the NOE intensity, and  $A$ ,  $B$  are constants that were obtained by fitting a power function to a plot of distance *versus* intensity for a set of intensities for which the distances are ‘known’. The following ‘known’ distances for a helical span (residues 3 – 8, in the present case) were used for the calibration:  $\text{NN}(i, i+1) = 2.8$ ,  $\alpha\text{N}(i, i) = 2.8$ ,  $\alpha\text{N}(i, i+1) = 3.5$  Å in the helical span, geminal  $\beta\beta'$  and Pro  $\delta\delta' = 1.9$  Å (*the geminal methylene distance is larger than the actual distance, 1.76 Å, to account for the fact that geminal NOEs are not in the linear growth regime at the mixing times employed*). This contrasts with the procedure employed for TC5b, where the NOEs were grouped by size category and the distances were adjusted further during the refinement procedure rather than relying on an automated program for generating distance constraints. Twenty eight structures (from 40 random starts) met

the acceptance criteria. The structural and convergence statistics for the ensemble appear in Table S2.

The NOE derived constraints employed for the CNS derivation of an NMR ensemble for TC10b appear in Table S3. Table S3 uses CNS nomenclature for prochiral CH<sub>2</sub> and CMe<sub>2</sub> groups; while the resonance assignment lists (*vide infra*) are given using the most recently formalized IUPAC nomenclature (Markley *et al.*, 1998). The dihedral values derived for TC10b are compared to those in the prior TC5b ensemble in Table S4.

**Table S2.** NMR structure statistics for the TC10b ensemble<sup>a</sup>

Distance constraints and r.m.s. deviations in the CNS ensemble:

| Type of constraint | Number | r.m.s. deviation <sup>b</sup> |
|--------------------|--------|-------------------------------|
| Intraresidue       | 85     | 0.0506 ± 0.0036               |
| Sequential         | 52     | 0.0303 ± 0.0031               |
| i/ i+n, n = 2-4    | 21     | 0.0098 ± 0.0036               |
| i/ i+n, n ≥ 5      | 28     | 0.0158 ± 0.0059               |

Structure statistics<sup>b</sup>:

|                                 |                 |
|---------------------------------|-----------------|
| E <sub>TOTAL</sub> (kcal/mol)   | -30.5 ± 4.2     |
| E <sub>NOE</sub> (kcal/mol)     | 20.7 ± 1.9      |
| E <sub>vdw</sub> (kcal/mol)     | -74.2 ± 3.3     |
| Bond violations (Å)             | 0.0037 ± 0.0001 |
| Angle violations (°)            | 0.478 ± 0.008   |
| Improper torsion violations (°) | 0.181 ± 0.012   |

Convergence within final ensemble, atomic r.m.s. deviations (Å)<sup>c</sup>:

Pairwise over the ensemble (±s.e.)

|            |             |
|------------|-------------|
| Backbone   | 0.41 ± 0.14 |
| Heavy atom | 1.02 ± 0.17 |

<sup>a</sup>. All statistics are over the 28 accepted structures of 40 structures.

<sup>b</sup>. Values are mean ± standard deviation.

<sup>c</sup>. All convergence measures are over residues 3-19.

**Footnote** – The TC5b structure ensemble (38/50 structures) was generated from 169 constraints (of which 28 were long-range) with similar acceptance criteria (NOE < 0.15 Å). Subsequent studies (to be reported elsewhere) have revealed that as few as 18 long-range constraints, with the addition of 36 medium- and short-range constraints can generate Trp-cage structure ensembles within a 0.63 ± 0.17 Å backbone RMSD of the published TC5b ensemble, which had a 0.39 ± 0.12 Å pairwise backbone RMSD.

**Table S3** NOE constraint list for TC10b

| !! i,j                                                     | d    | d-   | d+   | δ values  |
|------------------------------------------------------------|------|------|------|-----------|
| assign (residue 1 and name ha ) (residue 1 and name hb# )  | 2.65 | 0.30 | 0.26 | 4.25 2.98 |
| assign (residue 2 and name ha ) (residue 2 and name hb# )  | 3.00 | 0.50 | 0.30 | 4.27 1.52 |
| assign (residue 3 and name ha ) (residue 3 and name hb# )  | 2.53 | 0.27 | 0.24 | 4.03 3.14 |
| assign (residue 3 and name ha ) (residue 3 and name hd# )  | 2.84 | 0.36 | 0.71 | 4.03 7.09 |
| assign (residue 3 and name ha ) (residue 3 and name hn )   | 2.94 | 0.41 | 0.33 | 4.03 8.90 |
| assign (residue 3 and name hb# ) (residue 3 and name hd# ) | 2.51 | 0.24 | 0.66 | 3.13 7.10 |

|                                                              |      |      |      |      |      |
|--------------------------------------------------------------|------|------|------|------|------|
| assign (residue 3 and name hb# ) (residue 3 and name hn )    | 2.47 | 0.25 | 0.23 | 3.13 | 8.90 |
| assign (residue 4 and name ha ) (residue 4 and name hn )     | 2.74 | 0.35 | 0.28 | 4.12 | 8.35 |
| assign (residue 4 and name hb# ) (residue 4 and name hn )    | 2.70 | 0.23 | 0.24 | 1.58 | 8.34 |
| assign (residue 5 and name ha ) (residue 5 and name hb1 )    | 3.19 | 0.49 | 0.40 | 3.90 | 2.15 |
| assign (residue 5 and name ha ) (residue 5 and name hb2 )    | 3.23 | 0.51 | 0.41 | 3.90 | 2.23 |
| assign (residue 5 and name ha ) (residue 5 and name hn )     | 2.61 | 0.31 | 0.26 | 3.90 | 8.12 |
| assign (residue 5 and name hb1 ) (residue 5 and name hn )    | 2.65 | 0.32 | 0.27 | 2.15 | 8.13 |
| assign (residue 5 and name hb2 ) (residue 5 and name hn )    | 2.64 | 0.32 | 0.26 | 2.24 | 8.13 |
| assign (residue 6 and name ha ) (residue 6 and name hb1 )    | 3.00 | 0.20 | 0.20 | 4.24 | 3.56 |
| assign (residue 6 and name ha ) (residue 6 and name hb2 )    | 2.40 | 0.40 | 0.40 | 4.24 | 3.14 |
| assign (residue 6 and name ha ) (residue 6 and name hd1 )    | 2.98 | 0.43 | 0.54 | 4.23 | 6.98 |
| assign (residue 6 and name ha ) (residue 6 and name hn )     | 2.94 | 0.41 | 0.33 | 4.24 | 8.15 |
| assign (residue 6 and name hb1 ) (residue 6 and name hd1 )   | 3.23 | 0.51 | 0.61 | 3.55 | 6.97 |
| assign (residue 6 and name hb1 ) (residue 6 and name he3 )   | 3.07 | 0.45 | 0.56 | 3.55 | 6.97 |
| assign (residue 6 and name hb1 ) (residue 6 and name hn )    | 2.43 | 0.25 | 0.23 | 3.56 | 8.15 |
| assign (residue 6 and name hb2 ) (residue 6 and name hd1 )   | 2.83 | 0.38 | 0.51 | 3.14 | 6.98 |
| assign (residue 6 and name hb2 ) (residue 6 and name he3 )   | 3.26 | 0.52 | 0.62 | 3.14 | 6.98 |
| assign (residue 6 and name hb2 ) (residue 6 and name hn )    | 2.41 | 0.25 | 0.22 | 3.14 | 8.15 |
| assign (residue 6 and name hz2 ) (residue 6 and name he1 )   | 2.66 | 0.32 | 0.67 | 7.19 | 9.71 |
| assign (residue 7 and name ha ) (residue 7 and name hb1 )    | 2.50 | 0.20 | 0.25 | 3.39 | 1.36 |
| assign (residue 7 and name ha ) (residue 7 and name hb2 )    | 3.05 | 0.10 | 0.10 | 3.39 | 1.90 |
| assign (residue 7 and name ha ) (residue 7 and name hd1# )   | 4.25 | 0.73 | 0.62 | 3.40 | 0.99 |
| assign (residue 7 and name ha ) (residue 7 and name hd2# )   | 2.86 | 0.28 | 0.26 | 3.39 | 0.86 |
| assign (residue 7 and name ha ) (residue 7 and name hn )     | 2.88 | 0.40 | 0.32 | 3.38 | 8.37 |
| assign (residue 7 and name hb1 ) (residue 7 and name hd1# )  | 3.56 | 0.51 | 0.40 | 1.34 | 0.99 |
| assign (residue 7 and name hb1 ) (residue 7 and name hd2# )  | 3.41 | 0.46 | 0.37 | 1.35 | 0.87 |
| assign (residue 7 and name hb1 ) (residue 7 and name hn )    | 3.49 | 0.46 | 0.46 | 1.36 | 8.37 |
| assign (residue 7 and name hb2 ) (residue 7 and name hd1# )  | 3.43 | 0.47 | 0.37 | 1.90 | 0.99 |
| assign (residue 7 and name hb2 ) (residue 7 and name hd2# )  | 4.33 | 0.75 | 0.65 | 1.90 | 0.86 |
| assign (residue 7 and name hb2 ) (residue 7 and name hn )    | 2.66 | 0.33 | 0.27 | 1.90 | 8.37 |
| assign (residue 7 and name hd1# ) (residue 7 and name hn )   | 4.33 | 0.75 | 0.64 | 1.00 | 8.37 |
| assign (residue 7 and name hd2# ) (residue 7 and name hn )   | 4.74 | 0.88 | 0.83 | 0.87 | 8.37 |
| assign (residue 7 and name hg ) (residue 7 and name hn )     | 2.68 | 0.33 | 0.27 | 1.63 | 8.37 |
| assign (residue 8 and name ha ) (residue 8 and name hb# )    | 2.97 | 0.42 | 0.54 | 3.93 | 1.90 |
| assign (residue 8 and name ha ) (residue 8 and name hn )     | 2.52 | 0.28 | 0.24 | 3.92 | 8.12 |
| assign (residue 8 and name hb# ) (residue 8 and name hn )    | 2.29 | 0.21 | 0.40 | 1.90 | 8.11 |
| assign (residue 9 and name ha ) (residue 9 and name hb1 )    | 2.51 | 0.28 | 0.24 | 4.51 | 2.94 |
| assign (residue 9 and name ha ) (residue 9 and name hb2 )    | 3.01 | 0.20 | 0.20 | 4.51 | 2.71 |
| assign (residue 9 and name ha ) (residue 9 and name hn )     | 2.78 | 0.36 | 0.29 | 4.51 | 8.00 |
| assign (residue 9 and name hb1 ) (residue 9 and name hn )    | 3.25 | 0.48 | 0.39 | 2.91 | 8.00 |
| assign (residue 9 and name hb2 ) (residue 9 and name hn )    | 2.50 | 0.31 | 0.26 | 2.72 | 8.00 |
| assign (residue 10 and name ha# ) (residue 10 and name hn )  | 2.82 | 0.38 | 0.50 | 3.45 | 7.51 |
| assign (residue 11 and name ha1 ) (residue 11 and name hn )  | 2.92 | 0.38 | 0.30 | 3.13 | 8.51 |
| assign (residue 11 and name ha2 ) (residue 11 and name hn )  | 2.53 | 0.32 | 0.16 | 0.64 | 8.51 |
| assign (residue 12 and name ha ) (residue 12 and name hb1 )  | 2.73 | 0.35 | 0.28 | 4.65 | 2.54 |
| assign (residue 12 and name ha ) (residue 12 and name hg1 )  | 3.29 | 0.52 | 0.53 | 4.65 | 2.18 |
| assign (residue 12 and name hd1 ) (residue 12 and name hg1 ) | 2.85 | 0.39 | 0.31 | 3.48 | 2.17 |
| assign (residue 12 and name hd2 ) (residue 12 and name hb2 ) | 3.85 | 0.70 | 0.64 | 3.84 | 2.07 |
| assign (residue 12 and name hd2 ) (residue 12 and name hg2 ) | 2.94 | 0.51 | 0.33 | 3.83 | 2.17 |
| assign (residue 13 and name ha ) (residue 13 and name hb# )  | 2.69 | 0.31 | 0.26 | 4.49 | 3.94 |
| assign (residue 13 and name ha ) (residue 13 and name hn )   | 3.35 | 0.54 | 0.45 | 4.49 | 7.72 |
| assign (residue 13 and name hb# ) (residue 13 and name hn )  | 3.13 | 0.45 | 0.36 | 3.93 | 7.73 |
| assign (residue 14 and name ha ) (residue 14 and name hb1 )  | 2.50 | 0.20 | 0.20 | 4.13 | 3.85 |
| assign (residue 14 and name ha ) (residue 14 and name hb2 )  | 3.00 | 0.20 | 0.20 | 4.13 | 3.46 |
| assign (residue 14 and name ha ) (residue 14 and name hn )   | 2.90 | 0.40 | 0.32 | 4.13 | 8.25 |
| assign (residue 14 and name hb1 ) (residue 14 and name hn )  | 3.51 | 0.40 | 0.40 | 3.83 | 8.25 |
| assign (residue 14 and name hb2 ) (residue 14 and name hn )  | 2.76 | 0.36 | 0.29 | 3.46 | 8.25 |
| assign (residue 15 and name ha1 ) (residue 15 and name hn )  | 2.95 | 0.42 | 0.33 | 4.29 | 7.97 |



|                                                              |      |      |      |      |      |
|--------------------------------------------------------------|------|------|------|------|------|
| assign (residue 15 and name ha2 ) (residue 15 and name hn )  | 2.41 | 0.25 | 0.22 | 3.80 | 7.98 |
| assign (residue 16 and name ha ) (residue 16 and name hb# )  | 2.74 | 0.35 | 0.48 | 5.08 | 1.81 |
| assign (residue 16 and name hb# ) (residue 16 and name hn )  | 2.96 | 0.42 | 0.54 | 1.81 | 8.16 |
| assign (residue 16 and name hd# ) (residue 16 and name he )  | 3.15 | 0.48 | 0.59 | 3.22 | 7.75 |
| assign (residue 16 and name hd# ) (residue 16 and name hg# ) | 3.10 | 0.46 | 0.77 | 3.31 | 1.81 |
| assign (residue 17 and name ha ) (residue 17 and name hb1 )  | 2.52 | 0.28 | 0.24 | 4.77 | 2.35 |
| assign (residue 17 and name ha ) (residue 17 and name hg1 )  | 3.57 | 0.61 | 0.52 | 4.77 | 2.00 |
| assign (residue 17 and name hd1 ) (residue 17 and name hb2 ) | 3.70 | 0.65 | 0.57 | 3.86 | 1.80 |
| assign (residue 17 and name hd2 ) (residue 17 and name hb2 ) | 3.22 | 0.50 | 0.50 | 3.68 | 1.80 |
| assign (residue 17 and name hd2 ) (residue 17 and name hg2 ) | 2.75 | 0.39 | 0.31 | 3.68 | 1.99 |
| assign (residue 18 and name ha ) (residue 18 and name hb1 )  | 2.40 | 0.40 | 0.40 | 2.40 | 0.21 |
| assign (residue 18 and name ha ) (residue 18 and name hb2 )  | 3.00 | 0.20 | 0.20 | 2.40 | 1.31 |
| assign (residue 18 and name hd# ) (residue 18 and name hb1 ) | 3.90 | 0.70 | 0.62 | 3.52 | 0.21 |
| assign (residue 19 and name ha ) (residue 19 and name hb1 )  | 2.70 | 0.38 | 0.21 | 4.34 | 2.21 |
| assign (residue 19 and name ha ) (residue 19 and name hb2 )  | 3.30 | 0.53 | 0.43 | 4.34 | 1.99 |
| assign (residue 19 and name hd1 ) (residue 19 and name hg1 ) | 2.70 | 0.44 | 0.35 | 3.14 | 1.79 |
| assign (residue 19 and name hd1 ) (residue 19 and name hg2 ) | 3.27 | 0.52 | 0.42 | 3.14 | 1.84 |
| assign (residue 19 and name hd2 ) (residue 19 and name hg1 ) | 3.38 | 0.55 | 0.46 | 2.94 | 1.79 |
| assign (residue 19 and name hd2 ) (residue 19 and name hg2 ) | 3.00 | 0.54 | 0.20 | 2.94 | 1.84 |
| assign (residue 20 and name ha ) (residue 20 and name hb# )  | 2.60 | 0.29 | 0.25 | 4.16 | 3.77 |
| assign (residue 20 and name ha ) (residue 20 and name hn )   | 3.02 | 0.44 | 0.35 | 4.16 | 7.97 |

!! i,i+1

|                                                              |      |      |      |      |      |
|--------------------------------------------------------------|------|------|------|------|------|
| assign (residue 2 and name ha ) (residue 3 and name hn )     | 3.46 | 0.58 | 0.48 | 4.27 | 8.90 |
| assign (residue 2 and name hb# ) (residue 3 and name hn )    | 3.80 | 0.60 | 0.57 | 1.52 | 8.90 |
| assign (residue 3 and name ha ) (residue 4 and name hn )     | 3.91 | 0.72 | 0.67 | 4.03 | 8.35 |
| assign (residue 3 and name hb# ) (residue 4 and name hn )    | 2.76 | 0.34 | 0.28 | 3.14 | 8.35 |
| assign (residue 3 and name hd# ) (residue 4 and name ha )    | 3.47 | 0.56 | 0.87 | 4.10 | 7.09 |
| assign (residue 3 and name hn ) (residue 4 and name hn )     | 2.83 | 0.38 | 0.30 | 8.35 | 8.90 |
| assign (residue 4 and name ha ) (residue 5 and name hn )     | 3.71 | 0.66 | 0.58 | 4.11 | 8.12 |
| assign (residue 4 and name hb# ) (residue 5 and name hn )    | 3.28 | 0.42 | 0.34 | 1.58 | 8.12 |
| assign (residue 4 and name hn ) (residue 5 and name hn )     | 2.80 | 0.30 | 0.30 | 8.35 | 8.13 |
| assign (residue 5 and name hb1 ) (residue 6 and name hn )    | 2.92 | 0.41 | 0.33 | 2.15 | 8.14 |
| assign (residue 5 and name hb2 ) (residue 6 and name hn )    | 3.32 | 0.54 | 0.44 | 2.24 | 8.14 |
| assign (residue 6 and name ha ) (residue 7 and name hn )     | 4.05 | 0.76 | 0.74 | 4.24 | 8.36 |
| assign (residue 6 and name hb1 ) (residue 7 and name hn )    | 2.94 | 0.41 | 0.33 | 3.56 | 8.37 |
| assign (residue 6 and name he3 ) (residue 7 and name ha )    | 3.66 | 0.64 | 0.76 | 3.39 | 6.98 |
| assign (residue 6 and name he3 ) (residue 7 and name hd2# )  | 3.55 | 0.50 | 0.64 | 0.86 | 6.97 |
| assign (residue 6 and name he3 ) (residue 7 and name hg )    | 2.73 | 0.45 | 0.48 | 1.63 | 6.97 |
| assign (residue 6 and name he3 ) (residue 7 and name hn )    | 3.16 | 0.48 | 0.59 | 6.98 | 8.37 |
| assign (residue 6 and name hn ) (residue 7 and name hn )     | 2.57 | 0.27 | 0.23 | 8.36 | 8.15 |
| assign (residue 6 and name hz3 ) (residue 7 and name hd2# )  | 3.35 | 0.44 | 0.60 | 0.86 | 7.13 |
| assign (residue 7 and name ha ) (residue 8 and name hn )     | 3.41 | 0.56 | 0.46 | 3.39 | 8.11 |
| assign (residue 7 and name hb1 ) (residue 8 and name hn )    | 3.47 | 0.58 | 0.49 | 1.36 | 8.11 |
| assign (residue 7 and name hn ) (residue 8 and name hn )     | 2.51 | 0.21 | 0.27 | 8.37 | 8.12 |
| assign (residue 8 and name ha ) (residue 9 and name hn )     | 3.41 | 0.56 | 0.47 | 3.93 | 8.00 |
| assign (residue 8 and name hb# ) (residue 9 and name hn )    | 3.40 | 0.56 | 0.66 | 1.98 | 8.00 |
| assign (residue 8 and name hn ) (residue 9 and name hn )     | 2.47 | 0.27 | 0.33 | 8.01 | 8.11 |
| assign (residue 9 and name ha ) (residue 10 and name hn )    | 3.63 | 0.73 | 0.55 | 4.52 | 7.51 |
| assign (residue 9 and name hn ) (residue 10 and name hn )    | 2.96 | 0.42 | 0.33 | 7.51 | 8.00 |
| assign (residue 10 and name ha# ) (residue 11 and name hn )  | 3.10 | 0.47 | 0.57 | 3.46 | 8.50 |
| assign (residue 10 and name hn ) (residue 11 and name hn )   | 2.42 | 0.25 | 0.23 | 7.51 | 8.50 |
| assign (residue 11 and name ha1 ) (residue 12 and name hd1 ) | 2.41 | 0.35 | 0.22 | 3.48 | 3.11 |
| assign (residue 11 and name ha1 ) (residue 12 and name hd2 ) | 2.47 | 0.27 | 0.23 | 3.84 | 3.11 |
| assign (residue 11 and name hn ) (residue 12 and name hd2 )  | 3.90 | 0.72 | 0.77 | 3.83 | 8.50 |
| assign (residue 12 and name hb2 ) (residue 13 and name hn )  | 4.04 | 0.76 | 0.74 | 2.07 | 7.72 |
| assign (residue 12 and name hd1 ) (residue 13 and name hn )  | 4.00 | 0.70 | 1.00 |      |      |
| assign (residue 12 and name hd2 ) (residue 13 and name hn )  | 3.71 | 0.66 | 0.58 | 3.84 | 7.73 |

|                                                              |      |      |      |      |      |
|--------------------------------------------------------------|------|------|------|------|------|
| assign (residue 13 and name ha ) (residue 14 and name hn )   | 3.50 | 0.59 | 0.50 | 4.48 | 8.25 |
| assign (residue 13 and name hn ) (residue 14 and name hn )   | 2.72 | 0.34 | 0.28 | 7.73 | 8.25 |
| assign (residue 14 and name ha ) (residue 15 and name hn )   | 3.80 | 0.73 | 0.68 | 4.13 | 7.98 |
| assign (residue 14 and name hn ) (residue 15 and name hn )   | 3.09 | 0.46 | 0.37 | 7.99 | 8.25 |
| assign (residue 15 and name ha1 ) (residue 16 and name hn )  | 3.98 | 0.74 | 0.70 | 4.30 | 8.16 |
| assign (residue 15 and name ha2 ) (residue 16 and name hn )  | 3.79 | 0.68 | 0.62 | 3.80 | 8.16 |
| assign (residue 15 and name hn ) (residue 16 and name hn )   | 2.83 | 0.38 | 0.30 | 7.99 | 8.16 |
| assign (residue 16 and name ha ) (residue 17 and name hd1 )  | 2.51 | 0.38 | 0.24 | 5.08 | 3.87 |
| assign (residue 16 and name ha ) (residue 17 and name hd2 )  | 3.01 | 0.44 | 0.35 | 5.09 | 3.68 |
| assign (residue 16 and name hb# ) (residue 17 and name hd2 ) | 3.29 | 0.53 | 0.63 | 3.68 | 1.92 |
| assign (residue 17 and name ha ) (residue 18 and name hd# )  | 2.14 | 0.14 | 0.18 | 4.77 | 3.51 |
| assign (residue 17 and name hb1 ) (residue 18 and name hd# ) | 3.31 | 0.51 | 0.41 | 3.51 | 2.35 |
| assign (residue 18 and name ha ) (residue 19 and name hd1 )  | 2.55 | 0.29 | 0.20 | 3.15 | 2.40 |
| assign (residue 18 and name ha ) (residue 19 and name hd2 )  | 2.84 | 0.25 | 0.29 | 2.93 | 2.40 |
| assign (residue 18 and name hb2 ) (residue 19 and name hd2 ) | 3.89 | 0.72 | 0.66 | 2.94 | 1.30 |
| assign (residue 19 and name ha ) (residue 20 and name hn )   | 2.42 | 0.25 | 0.23 | 4.34 | 7.97 |
| assign (residue 19 and name hb2 ) (residue 20 and name hn )  | 3.91 | 0.72 | 0.67 | 2.00 | 7.96 |

!! i,i+2

|                                                            |      |      |      |      |      |
|------------------------------------------------------------|------|------|------|------|------|
| assign (residue 8 and name ha ) (residue 10 and name hn )  | 3.93 | 0.73 | 0.68 | 3.93 | 7.51 |
| assign (residue 8 and name hn ) (residue 10 and name hn )  | 3.86 | 0.71 | 0.75 | 8.11 | 7.52 |
| assign (residue 9 and name hn ) (residue 11 and name hn )  | 3.87 | 0.71 | 0.65 | 8.01 | 8.50 |
| assign (residue 13 and name ha ) (residue 15 and name hn ) | 3.81 | 0.69 | 0.62 | 4.49 | 7.98 |

!! i,i+3

|                                                            |      |      |      |      |      |
|------------------------------------------------------------|------|------|------|------|------|
| assign (residue 2 and name ha ) (residue 5 and name hb1 )  | 3.63 | 0.63 | 0.55 | 4.27 | 2.15 |
| assign (residue 2 and name ha ) (residue 5 and name hb2 )  | 3.67 | 0.65 | 0.56 | 4.27 | 2.25 |
| assign (residue 2 and name ha ) (residue 5 and name hn )   | 3.36 | 0.55 | 0.45 | 4.27 | 8.13 |
| assign (residue 2 and name hb# ) (residue 5 and name hn )  | 4.54 | 0.82 | 0.83 | 1.52 | 8.12 |
| assign (residue 3 and name ha ) (residue 6 and name hb1 )  | 2.56 | 0.30 | 0.25 | 4.03 | 3.56 |
| assign (residue 3 and name ha ) (residue 6 and name he3 )  | 4.00 | 0.80 | 0.60 |      |      |
| assign (residue 3 and name ha ) (residue 6 and name hn )   | 3.79 | 0.68 | 0.61 | 4.03 | 8.15 |
| assign (residue 3 and name he# ) (residue 6 and name hz3 ) | 3.11 | 0.45 | 0.98 | 6.83 | 7.13 |
| assign (residue 4 and name ha ) (residue 7 and name hb2 )  | 3.41 | 0.56 | 0.47 | 4.12 | 1.90 |
| assign (residue 4 and name ha ) (residue 7 and name hd1# ) | 3.62 | 0.53 | 0.42 | 4.12 | 0.99 |
| assign (residue 6 and name ha ) (residue 9 and name hb1 )  | 4.00 | 0.20 | 1.00 |      |      |
| assign (residue 6 and name ha ) (residue 9 and name hb2 )  | 3.20 | 0.50 | 0.40 | 4.23 | 2.71 |
| assign (residue 6 and name ha ) (residue 9 and name hn )   | 3.81 | 0.69 | 0.62 | 4.22 | 8.00 |

!! i,i+4

|                                                             |      |      |      |      |      |
|-------------------------------------------------------------|------|------|------|------|------|
| assign (residue 3 and name hd# ) (residue 7 and name hd1# ) | 4.12 | 0.66 | 1.04 | 0.99 | 7.10 |
| assign (residue 3 and name he# ) (residue 7 and name hd1# ) | 3.46 | 0.45 | 0.86 | 0.99 | 6.83 |
| assign (residue 3 and name he# ) (residue 7 and name hd2# ) | 4.11 | 0.66 | 1.03 | 0.86 | 6.83 |
| assign (residue 7 and name ha ) (residue 11 and name hn )   | 2.74 | 0.45 | 0.29 | 3.39 | 8.50 |

!! i,i+n

|                                                             |      |      |      |      |      |
|-------------------------------------------------------------|------|------|------|------|------|
| assign (residue 3 and name ha ) (residue 19 and name hb1 )  | 4.00 | 0.50 | 1.50 |      |      |
| assign (residue 3 and name ha ) (residue 19 and name hb2 )  | 4.00 | 0.50 | 1.50 |      |      |
| assign (residue 3 and name ha ) (residue 19 and name hd2 )  | 3.67 | 0.64 | 0.56 | 4.04 | 2.93 |
| assign (residue 3 and name ha ) (residue 19 and name hg1 )  | 3.39 | 0.56 | 0.46 | 4.04 | 1.80 |
| assign (residue 3 and name ha ) (residue 19 and name hg2 )  | 3.44 | 0.57 | 0.48 | 4.03 | 1.85 |
| assign (residue 3 and name hd# ) (residue 19 and name hd2 ) | 3.29 | 0.51 | 0.82 | 2.93 | 7.10 |
| assign (residue 3 and name he# ) (residue 18 and name hb1 ) | 3.87 | 0.59 | 1.12 | 0.20 | 6.83 |
| assign (residue 3 and name he# ) (residue 18 and name hb2 ) | 3.41 | 0.54 | 0.85 | 1.31 | 6.83 |
| assign (residue 6 and name hd1 ) (residue 16 and name hb# ) | 2.94 | 0.41 | 0.73 | 1.81 | 6.98 |
| assign (residue 6 and name hd1 ) (residue 16 and name he )  | 3.51 | 0.60 | 0.70 | 6.99 | 7.75 |
| assign (residue 6 and name hd1 ) (residue 16 and name hg# ) | 2.52 | 0.28 | 0.64 | 1.65 | 6.98 |
| assign (residue 6 and name hd1 ) (residue 18 and name ha )  | 3.33 | 0.54 | 0.64 | 2.40 | 6.98 |

|                                                             |      |      |      |      |      |
|-------------------------------------------------------------|------|------|------|------|------|
| assign (residue 6 and name hd1 ) (residue 19 and name hd2 ) | 3.58 | 0.62 | 0.73 | 2.93 | 6.99 |
| assign (residue 6 and name he1 ) (residue 16 and name hb# ) | 3.50 | 0.59 | 0.90 | 1.82 | 9.71 |
| assign (residue 6 and name he1 ) (residue 16 and name hg# ) | 3.68 | 0.65 | 0.97 | 1.66 | 9.71 |
| assign (residue 6 and name he1 ) (residue 16 and name hn )  | 3.83 | 0.70 | 0.83 | 8.17 | 9.71 |
| assign (residue 6 and name he1 ) (residue 18 and name ha )  | 3.50 | 0.59 | 0.70 | 2.40 | 9.71 |
| assign (residue 6 and name hh2 ) (residue 12 and name ha )  | 3.51 | 0.59 | 0.80 | 4.64 | 7.22 |
| assign (residue 6 and name hh2 ) (residue 12 and name hd1 ) | 2.92 | 0.41 | 0.53 | 3.49 | 7.22 |
| assign (residue 6 and name hh2 ) (residue 12 and name hg# ) | 3.24 | 0.51 | 0.81 | 2.17 | 7.22 |
| assign (residue 6 and name hz2 ) (residue 12 and name ha )  | 2.92 | 0.51 | 0.53 | 4.64 | 7.18 |
| assign (residue 6 and name hz2 ) (residue 12 and name hg# ) | 3.44 | 0.57 | 0.87 | 2.17 | 7.19 |
| assign (residue 6 and name hz2 ) (residue 18 and name hd1 ) | 2.76 | 0.34 | 0.49 | 3.51 | 7.18 |
| assign (residue 6 and name hz2 ) (residue 18 and name hg1 ) | 3.65 | 0.64 | 0.75 | 1.65 | 7.18 |
| assign (residue 9 and name hb1 ) (residue 14 and name hb1 ) | 3.00 | 0.43 | 0.34 | 3.84 | 2.94 |
| assign (residue 9 and name hb1 ) (residue 14 and name hb2 ) | 3.57 | 0.61 | 0.52 | 3.47 | 2.94 |
| assign (residue 9 and name hb2 ) (residue 14 and name hb1 ) | 4.30 | 0.40 | 2.00 |      |      |
| assign (residue 9 and name hb2 ) (residue 14 and name hb2 ) | 4.30 | 0.40 | 2.00 |      |      |

**Table S4. Comparison of dihedral angles ( $\pm$ s.d.) between the TC10b (28 structures) and TC5b (24 structures) NMR ensembles.**

| Residue | $\phi$ | $\psi$ | $\chi^1$ | Residue | $\phi$ | $\psi$ | $\chi^1$ |
|---------|--------|--------|----------|---------|--------|--------|----------|
|---------|--------|--------|----------|---------|--------|--------|----------|

| <b>TC5b</b> |              |             |              | <b>TC10b</b> |              |              |              |
|-------------|--------------|-------------|--------------|--------------|--------------|--------------|--------------|
| N1          |              | -48.2(69.5) | -100.3(62.9) | D1           |              | -111.2(93.2) | -117.1(72.3) |
| L2          | -28.0(68.4)  | -22.2(19.7) | -87.6 (58.2) | A2           | -103.5(61.8) | -0.7 (32.0)  |              |
| Y3          | -58.2 (3.1)  | -35.6 (3.0) | -146.3 (8.4) | Y3           | -69.5 (11.7) | -38.3 (2.0)  | -152.1 (7.9) |
| I4          | -61.3 (2.5)  | -48.1 (2.8) | -52.3 (4.3)  | A4           | -57.8 (1.1)  | -41.5 (1.4)  |              |
| Q5          | -62.3 (3.3)  | -41.6 (5.5) | -109.5(30.4) | Q5           | -73.4 (2.9)  | -36.1 (2.3)  | -149.5 (2.6) |
| W6          | -63.1 (4.1)  | -44.6 (2.9) | -180.0 (2.2) | W6           | -55.4 (1.5)  | -44.6 (1.2)  | -171.8 (1.9) |
| L7          | -62.7 (2.1)  | -38.2 (3.1) | -74.7 (2.3)  | L7           | -70.2 (2.2)  | -37.6 (2.2)  | -68.4 (2.9)  |
| K8          | -56.1 (2.3)  | -33.6 (4.6) | -124.5(61.0) | K8           | -58.0 (1.1)  | -32.7 (4.4)  | -124.6(31.8) |
| D9          | -72.6 (4.6)  | -18.0(10.6) | -125.7(37.9) | D9           | -87.4 (8.7)  | 20.4(22.0)   | -73.0 (9.5)  |
| G10         | 119.5(13.3)  | -10.3 (6.2) |              | G10          | 83.2(22.4)   | 21.7 (13.8)  |              |
| G11         | 55.9 (3.3)   | -126.3(7.6) |              | G11          | 59.0 (3.6)   | -119.9(3.4)  |              |
| P12         | -56.6 (1.9)  | -27.1 (3.7) | -20.5 (1.7)  | P12          | -77.1(14.5)  | 8.2 (18.1)   | 14.7 (24.9)  |
| S13         | -76.9 (10.1) | -0.5 (18.2) | -31.2 (84.0) | S13          | -79.5(10.4)  | -34.3(12.2)  | -104.4(68.7) |
| S14         | -94.6 (15.8) | -1.8 (7.5)  | -55.7 (33.2) | S14          | -71.7(12.6)  | -28.9(18.7)  | -32.1 (24.8) |
| G15         | 73.1 (3.8)   | -1.7 (28.7) |              | G15          | 86.3(12.1)   | 13.6(15.8)   |              |
| R16         | -112.3(38.7) | 136.3(4.6)  | 109.6 (68.0) | R16          | -96.4(19.5)  | 134.5 (7.0)  | 125.5(73.0)  |
| P17         | -68.6 (2.8)  | 161.2 (2.4) | 28.6 (1.7)   | P17          | -63.5(12.0)  | 129.4 (9.4)  | -4.5 (23.8)  |
| P18         | -69.2 (2.4)  | 148.7 (8.0) | 26.7 (1.5)   | P18          | -62.2 (3.4)  | 135.9 (5.2)  | 19.7 (2.3)   |
| P19         | -79.1 (3.0)  | 97.2 (73.5) | 31.5 (1.7)   | P19          | -81.8 (1.6)  | 112.2(20.6)  | 30.8 (0.8)   |
| S20         | -119.0(82.0) |             | -102.7(96.0) | S20          | -121.3(26.3) |              | -79.9 (76.2) |

## Incorporating other NMR data into TC10b structural models

### *Method details –*

The NMR ensemble of TC10b, which was calculated without any H-bonding restraints, was sequentially modified by including a distance restraint ( $D9C\gamma/R16C\zeta = 3.9 - 5.1 \text{ \AA}$ ) intended to maintain the ends of the Asp<sup>9</sup> and Arg<sup>16</sup> sidechains within salt-bridging distance and the consensus H-bonds (6H<sub>N</sub>-2O', 6H<sub>E</sub>-16O', 7H<sub>N</sub>-3O', 8H<sub>N</sub>-4O') from the initial TC10b ensemble were restrained with H<sub>N</sub>-O' distances corresponding to those observed over the entire NMR ensemble. This produced a more converged ensemble (residue 3-19 backbone RMSD =  $0.41 \pm 0.15 \text{ \AA}$ ) with a decrease in the E<sub>NOE</sub> parameter (11.6 versus 20.7 kcal/mol), and remained structurally consistent with the ensemble generated without H-bond restraints as reflected in the inter-ensemble residue 3-19 backbone rmsd ( $0.43 \pm 0.15 \text{ \AA}$ ). A control MD annealing run applying the original NOE constraints to the same folded structure ensemble did not improve convergence and resulted in a smaller decrease in the E<sub>NOE</sub> parameter compared to runs with added non-NOE constraints.

The effects of adding, serially in alternative modes, additional H-bond restraints (16H<sub>E</sub>-14O $\gamma$ , 9H<sub>N</sub>-5O' versus 9H<sub>N</sub>-6O', 11H<sub>N</sub>-6O' versus 11H<sub>N</sub>-7O', and 14H $\gamma$ -9O' versus 14H $\gamma$ -10O' versus 14H $\gamma$ -11O'), and then narrowing the restraint for  $\alpha$ -helical H<sub>N</sub>/O' H-bonds to  $2.0 + 0.2 \text{ \AA}$  was examined by additional CNS annealing and Powell minimization protocols. Most sets of additional H-bond restraints did not increase the E<sub>NOE</sub> term or the violations of the 49 medium- and long-range NOE constraints that define the Trp-cage motif. The only pattern that could be eliminated based on a significantly less good fit to the NOE-derived constraints, higher E<sub>TOT</sub> measures and/or inability to fit expected H-bonding distances were models incorporating the 14H $\gamma$ -10O' H-bond as a restraint. The discrimination between alternative models increased when the more restrictive H<sub>N</sub>/O' distances were employed. The CNS runs with varying added restraints indicated that a 9H<sub>N</sub>-5O' was superior to a 9H<sub>N</sub>-6O' H-bond but no clear choice could be made between 14H $\gamma$ -9O' and 14H $\gamma$ -11O' H-bonding. Defining the H-bond acceptor for the fully exchange protected Gly<sup>11</sup>-H<sub>N</sub> was less problematic. Based on E<sub>TOT</sub> and E<sub>NOE</sub> criteria, as well as H-bond geometries, the 11H<sub>N</sub>-7O' restraint was better independent of both the 14H $\gamma$  and 9H<sub>N</sub> acceptor specifications. For example with the 14H $\gamma$ -9O' and 9H<sub>N</sub>-5O' bonding pattern, an 11H<sub>N</sub>-6O' restraint still produces 11H<sub>N</sub>-7O' H-bonds *and* the 11H<sub>N</sub>-7O' bonds displayed geometries that were in closer accord with expectations for a strong H-bond. As a result, the Gly<sup>11</sup> amide NH is protected in this model with the buried Trp<sup>6</sup>-C=O also sequestered to a significant extent.

The observation that the Trp-cage can accommodate Thr (and allo-Thr) in place of Ser<sup>14</sup> provides additional tests of the validity of the proposed hydrogen bonding networks. The ensembles accepted based on energies and NOE distance RMSDs position S14H $\gamma$  pointed toward the carbonyl of D9 or G11. In the best two ensembles, the  $\chi^1$  dihedral angles are identical (S14H $\gamma$ -D9O' with Ser<sup>14</sup>  $\chi^1 = -16.8^\circ \pm 16.5^\circ$ ; S14H $\gamma$ -11O' with  $\chi^1 = -15.5^\circ \pm 16.4^\circ$ ) thus the S14H $\beta$  protons are positioned uniquely. Given that the Ser to allo-Thr and Ser to Thr mutational effects on stability are small,  $< 0.7$  and circa 2 kJ/mol, respectively (textual Table 3), we can assume that the 14H $\gamma$  H-bonding is retained in both mutants. As a result, the replacement of S14 with Thr and allo-Thr in these ensembles can be done without changing the  $\chi^1$  dihedral angle and provides models for comparison with CSD and NOE data. In the NOESY spectra of S14T, the Thr methyl (H $\gamma$ 2) displayed only a single non-intraresidue NOE, a very large peak with the shift coincident C $\beta$ H<sub>2</sub> of D9; this was much diminished in the allo-Thr analog (in which the diastereotopic shift difference for D9-C $\beta$ H<sub>2</sub> is restored). The (S14T)-TC10b ensembles based on structures generated with 9H<sub>N</sub>-5O'/11H<sub>N</sub>-7O'/14H $\gamma$ -9O' and 9H<sub>N</sub>-5O'/11H<sub>N</sub>-6O'/14H $\gamma$ -11O' H-bond restraints displayed the

shortest  $14\text{H}\gamma 2/9\text{C}_\beta\text{H}_2$  distances and rationalized the changes observed in the chemical shifts of  $9\text{C}_\beta\text{H}_2$ . The allo-Thr analog displayed a new NOE between  $\text{H}\gamma 2$  and  $\text{W6H}\delta 1$  which is fully consistent with the location of this methyl implied by the low energy TC10b structure generated with  $9\text{H}_\text{N}-5\text{O}'/11\text{H}_\text{N}-7\text{O}'/14\text{H}\gamma-9\text{O}'$  or  $9\text{H}_\text{N}-5\text{O}'/11\text{H}_\text{N}-6\text{O}'/14\text{H}\gamma-11\text{O}'$  H-bond restraints. Distinguishing between a  $14\text{H}\gamma-9\text{O}'$  and  $14\text{H}\gamma-11\text{O}'$  H-bond is not possible; as this corresponds to nothing more than a change in  $\chi^2$  of S14.

### **Results and Discussion –**

The addition of H-bond restraints did not produce significant changes in the  $\phi/\psi$  values from residue 3 – 18; there were small but significant changes in a few  $\chi^1$  dihedrals: notable a narrowing of D9 and R16  $\chi$ -values reflecting the salt bridge and Ser<sup>14</sup> with  $\chi^1 \cong -16^\circ$  reflecting H-bonding interactions. The ensemble generated using  $9\text{HN}-5\text{O}'$ ,  $11\text{HN}-7\text{O}'$ ,  $14\text{H}\gamma-9\text{O}'$ , and  $16\text{H}\epsilon-14\text{O}\gamma$  restraints is viewed as that most consistent with both the NOEs and exchange protection data. Views of a representative structure from this ensemble, illustrating the H-bonding network in the vicinity of the Ser<sup>14</sup> sidechain the D9/R16 salt bridge appear in the left hand panel of Figure S2; the right hand panel is a view of this region of the computer simulated fold of TC5b derived by Simmerling and Roitberg. The Cartesian coordinates for our model appear in Table S5 and can be requested from the authors as a PDB file.

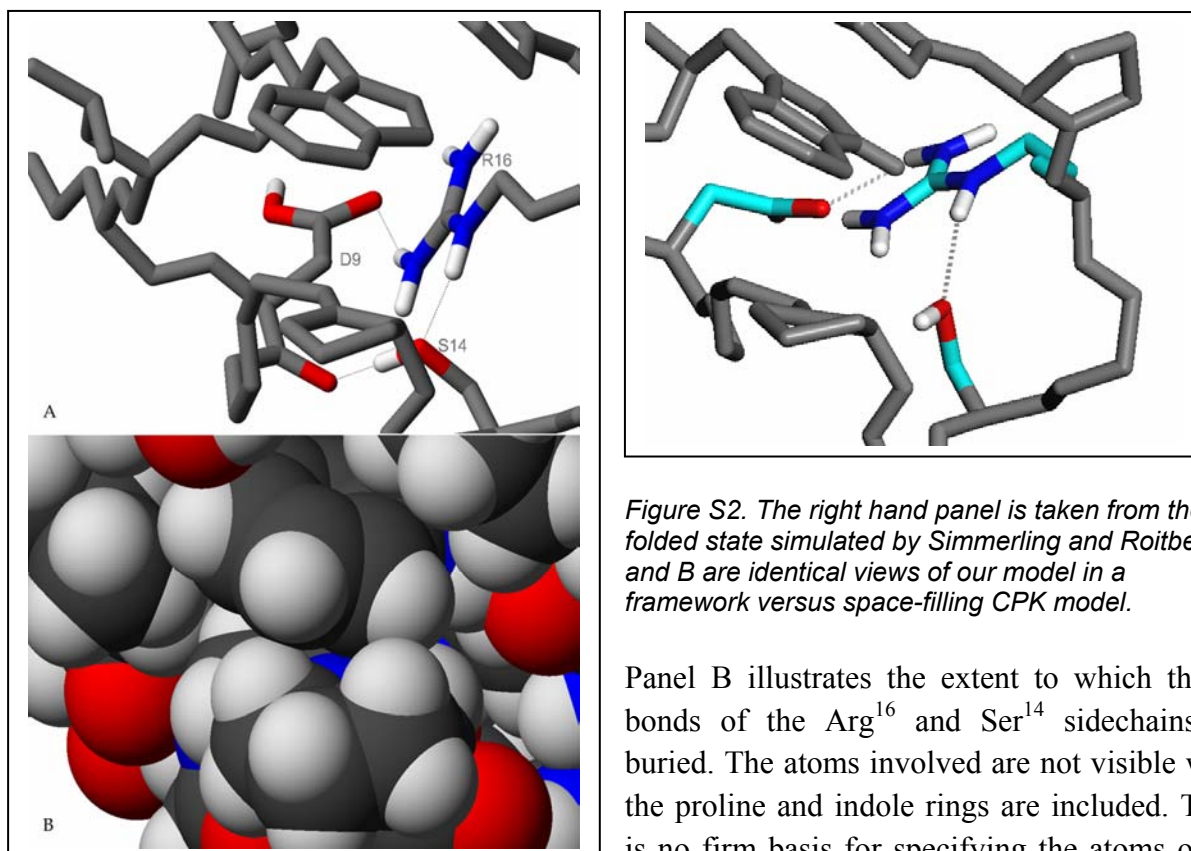

*Figure S2. The right hand panel is taken from the folded state simulated by Simmerling and Roitberg. A and B are identical views of our model in a framework versus space-filling CPK model.*

Panel B illustrates the extent to which the H-bonds of the Arg<sup>16</sup> and Ser<sup>14</sup> sidechains are buried. The atoms involved are not visible when the proline and indole rings are included. There is no firm basis for specifying the atoms of the

D9 and R16 that are involved in H-bond that stabilizes the salt-bridge. In panel A, D9 is shown with a protonated carboxyl.

The present model represents our best model for the structure of TC10b (and other stable Trp-cage species). Hopefully, collaborators will eventually obtain an X-ray crystal structure for one

of our Trp-cage constructs. Until that time we recommend the use of the model specified by the atomic coordinates in Table S5 as the starting point for computer simulations of Trp-cage unfolding.

**Table S5** – Atomic coordinates for a representative low-energy structure of TC10b with added non-NOE salt bridge and hydrogen bond information (D9C $\gamma$ -R16C $\zeta$ , 6H<sub>N</sub>-2O', 6H $\epsilon$ 1-16O', 7H<sub>N</sub>-3O', 8H<sub>N</sub>-4O', 9HN-5O', 11HN-7O', 14H $\gamma$ -9O', and 16H $\epsilon$ -14O $\gamma$ ).

|          |      |     |   |        |        |        |   |          |      |     |   |        |        |        |
|----------|------|-----|---|--------|--------|--------|---|----------|------|-----|---|--------|--------|--------|
| ATOM 1   | N    | ASP | 1 | -2.119 | 13.313 | -4.420 | / | ATOM 2   | HT1  | ASP | 1 | -1.247 | 13.403 | -4.923 |
| ATOM 3   | HT2  | ASP | 1 | -2.772 | 12.774 | -4.974 | / | ATOM 4   | HT3  | ASP | 1 | -2.505 | 14.232 | -4.245 |
| ATOM 5   | CA   | ASP | 1 | -1.899 | 12.628 | -3.133 | / | ATOM 6   | HA   | ASP | 1 | -1.167 | 13.200 | -2.559 |
| ATOM 7   | CB   | ASP | 1 | -3.193 | 12.578 | -2.313 | / | ATOM 8   | HB2  | ASP | 1 | -4.000 | 13.102 | -2.828 |
| ATOM 9   | HB1  | ASP | 1 | -3.508 | 11.548 | -2.136 | / | ATOM 10  | CG   | ASP | 1 | -2.889 | 13.252 | -0.991 |
| ATOM 11  | OD1  | ASP | 1 | -3.059 | 14.487 | -0.958 | / | ATOM 12  | OD2  | ASP | 1 | -2.349 | 12.532 | -0.125 |
| ATOM 13  | C    | ASP | 1 | -1.339 | 11.226 | -3.333 | / | ATOM 14  | O    | ASP | 1 | -1.965 | 10.421 | -4.017 |
| ATOM 15  | N    | ALA | 2 | -0.171 | 10.932 | -2.753 | / | ATOM 16  | HN   | ALA | 2 | 0.307  | 11.628 | -2.197 |
| ATOM 17  | CA   | ALA | 2 | 0.429  | 9.597  | -2.816 | / | ATOM 18  | HA   | ALA | 2 | 0.414  | 9.254  | -3.852 |
| ATOM 19  | CB   | ALA | 2 | 1.892  | 9.701  | -2.371 | / | ATOM 20  | HB1  | ALA | 2 | 2.430  | 10.386 | -3.027 |
| ATOM 21  | HB2  | ALA | 2 | 1.952  | 10.066 | -1.345 | / | ATOM 22  | HB3  | ALA | 2 | 2.363  | 8.719  | -2.431 |
| ATOM 23  | C    | ALA | 2 | -0.342 | 8.560  | -1.975 | / | ATOM 24  | O    | ALA | 2 | -0.412 | 7.388  | -2.353 |
| ATOM 25  | N    | TYR | 3 | -0.978 | 8.987  | -0.872 | / | ATOM 26  | HN   | TYR | 3 | -0.904 | 9.963  | -0.615 |
| ATOM 27  | CA   | TYR | 3 | -1.760 | 8.108  | 0.006  | / | ATOM 28  | HA   | TYR | 3 | -1.096 | 7.324  | 0.371  |
| ATOM 29  | CB   | TYR | 3 | -2.273 | 8.907  | 1.216  | / | ATOM 30  | HB2  | TYR | 3 | -1.605 | 9.752  | 1.395  |
| ATOM 31  | HB1  | TYR | 3 | -3.257 | 9.324  | 0.997  | / | ATOM 32  | CG   | TYR | 3 | -2.345 | 8.084  | 2.490  |
| ATOM 33  | CD1  | TYR | 3 | -1.444 | 8.349  | 3.538  | / | ATOM 34  | HD1  | TYR | 3 | -0.745 | 9.167  | 3.453  |
| ATOM 35  | CE1  | TYR | 3 | -1.449 | 7.558  | 4.700  | / | ATOM 36  | HE1  | TYR | 3 | -0.757 | 7.758  | 5.503  |
| ATOM 37  | CZ   | TYR | 3 | -2.365 | 6.493  | 4.820  | / | ATOM 38  | OH   | TYR | 3 | -2.355 | 5.722  | 5.941  |
| ATOM 39  | HH   | TYR | 3 | -3.007 | 5.022  | 5.903  | / | ATOM 40  | CE2  | TYR | 3 | -3.288 | 6.237  | 3.781  |
| ATOM 41  | HE2  | TYR | 3 | -3.997 | 5.430  | 3.872  | / | ATOM 42  | CD2  | TYR | 3 | -3.279 | 7.037  | 2.623  |
| ATOM 43  | HD2  | TYR | 3 | -3.988 | 6.842  | 1.833  | / | ATOM 44  | C    | TYR | 3 | -2.924 | 7.438  | -0.743 |
| ATOM 45  | O    | TYR | 3 | -3.235 | 6.266  | -0.519 | / | ATOM 46  | N    | ALA | 4 | -3.528 | 8.167  | -1.690 |
| ATOM 47  | HN   | ALA | 4 | -3.210 | 9.115  | -1.832 | / | ATOM 48  | CA   | ALA | 4 | -4.574 | 7.649  | -2.560 |
| ATOM 49  | HA   | ALA | 4 | -5.394 | 7.290  | -1.935 | / | ATOM 50  | CB   | ALA | 4 | -5.097 | 8.789  | -3.441 |
| ATOM 51  | HB1  | ALA | 4 | -5.422 | 9.622  | -2.817 | / | ATOM 52  | HB2  | ALA | 4 | -4.314 | 9.130  | -4.120 |
| ATOM 53  | HB3  | ALA | 4 | -5.948 | 8.440  | -4.026 | / | ATOM 54  | C    | ALA | 4 | -4.092 | 6.471  | -3.418 |
| ATOM 55  | O    | ALA | 4 | -4.901 | 5.590  | -3.712 | / | ATOM 56  | N    | GLN | 5 | -2.814 | 6.443  | -3.826 |
| ATOM 57  | HN   | GLN | 5 | -2.192 | 7.184  | -3.522 | / | ATOM 58  | CA   | GLN | 5 | -2.216 | 5.310  | -4.535 |
| ATOM 59  | HA   | GLN | 5 | -2.960 | 4.918  | -5.225 | / | ATOM 60  | CB   | GLN | 5 | -0.990 | 5.762  | -5.347 |
| ATOM 61  | HB2  | GLN | 5 | -1.182 | 6.741  | -5.787 | / | ATOM 62  | HB1  | GLN | 5 | -0.123 | 5.850  | -4.691 |
| ATOM 63  | CG   | GLN | 5 | -0.672 | 4.769  | -6.479 | / | ATOM 64  | HG2  | GLN | 5 | 0.239  | 5.091  | -6.983 |
| ATOM 65  | HG1  | GLN | 5 | -0.497 | 3.775  | -6.066 | / | ATOM 66  | CD   | GLN | 5 | -1.798 | 4.713  | -7.513 |
| ATOM 67  | OE1  | GLN | 5 | -2.122 | 5.699  | -8.158 | / | ATOM 68  | NE2  | GLN | 5 | -2.473 | 3.594  | -7.678 |
| ATOM 69  | HE21 | GLN | 5 | -3.143 | 3.613  | -8.422 | / | ATOM 70  | HE22 | GLN | 5 | -2.252 | 2.709  | -7.177 |
| ATOM 71  | C    | GLN | 5 | -1.844 | 4.183  | -3.567 | / | ATOM 72  | O    | GLN | 5 | -2.134 | 3.024  | -3.851 |
| ATOM 73  | N    | TRP | 6 | -1.269 | 4.528  | -2.405 | / | ATOM 74  | HN   | TRP | 6 | -1.046 | 5.510  | -2.265 |
| ATOM 75  | CA   | TRP | 6 | -0.961 | 3.579  | -1.329 | / | ATOM 76  | HA   | TRP | 6 | -0.177 | 2.907  | -1.681 |
| ATOM 77  | CB   | TRP | 6 | -0.421 | 4.340  | -0.107 | / | ATOM 78  | HB2  | TRP | 6 | 0.351  | 5.034  | -0.442 |
| ATOM 79  | HB1  | TRP | 6 | -1.222 | 4.935  | 0.328  | / | ATOM 80  | CG   | TRP | 6 | 0.165  | 3.495  | 0.983  |
| ATOM 81  | CD1  | TRP | 6 | 1.453  | 3.088  | 1.051  | / | ATOM 82  | HD1  | TRP | 6 | 2.215  | 3.325  | 0.324  |
| ATOM 83  | NE1  | TRP | 6 | 1.648  | 2.336  | 2.193  | / | ATOM 84  | HE1  | TRP | 6 | 2.551  | 1.927  | 2.450  |
| ATOM 85  | CE2  | TRP | 6 | 0.491  | 2.245  | 2.937  | / | ATOM 86  | CZ2  | TRP | 6 | 0.192  | 1.645  | 4.169  |
| ATOM 87  | HZ2  | TRP | 6 | 0.960  | 1.114  | 4.710  | / | ATOM 88  | CH2  | TRP | 6 | -1.109 | 1.761  | 4.688  |
| ATOM 89  | HH2  | TRP | 6 | -1.354 | 1.309  | 5.639  | / | ATOM 90  | CZ3  | TRP | 6 | -2.090 | 2.469  | 3.971  |
| ATOM 91  | HZ3  | TRP | 6 | -3.089 | 2.554  | 4.375  | / | ATOM 92  | CE3  | TRP | 6 | -1.774 | 3.076  | 2.739  |
| ATOM 93  | HE3  | TRP | 6 | -2.524 | 3.637  | 2.204  | / | ATOM 94  | CD2  | TRP | 6 | -0.477 | 2.979  | 2.189  |
| ATOM 95  | C    | TRP | 6 | -2.181 | 2.706  | -1.000 | / | ATOM 96  | O    | TRP | 6 | -2.092 | 1.484  | -1.080 |
| ATOM 97  | N    | LEU | 7 | -3.343 | 3.318  | -0.723 | / | ATOM 98  | HN   | LEU | 7 | -3.341 | 4.335  | -0.679 |
| ATOM 99  | CA   | LEU | 7 | -4.599 | 2.588  | -0.504 | / | ATOM 100 | HA   | LEU | 7 | -4.435 | 1.855  | 0.283  |
| ATOM 101 | CB   | LEU | 7 | -5.711 | 3.549  | -0.057 | / | ATOM 102 | HB2  | LEU | 7 | -5.768 | 4.372  | -0.771 |
| ATOM 103 | HB1  | LEU | 7 | -6.664 | 3.016  | -0.085 | / | ATOM 104 | CG   | LEU | 7 | -5.519 | 4.113  | 1.361  |
| ATOM 105 | HG   | LEU | 7 | -4.538 | 4.578  | 1.436  | / | ATOM 106 | CD1  | LEU | 7 | -6.582 | 5.182  | 1.620  |
| ATOM 107 | HD11 | LEU | 7 | -6.490 | 5.978  | 0.881  | / | ATOM 108 | HD12 | LEU | 7 | -7.578 | 4.742  | 1.553  |
| ATOM 109 | HD13 | LEU | 7 | -6.446 | 5.609  | 2.613  | / | ATOM 110 | CD2  | LEU | 7 | -5.641 | 3.034  | 2.445  |
| ATOM 111 | HD21 | LEU | 7 | -6.596 | 2.515  | 2.352  | / | ATOM 112 | HD22 | LEU | 7 | -4.832 | 2.310  | 2.358  |
| ATOM 113 | HD23 | LEU | 7 | -5.583 | 3.491  | 3.432  | / | ATOM 114 | C    | LEU | 7 | -5.062 | 1.783  | -1.725 |
| ATOM 115 | O    | LEU | 7 | -5.433 | 0.621  | -1.556 | / | ATOM 116 | N    | LYS | 8 | -5.033 | 2.370  | -2.936 |
| ATOM 117 | HN   | LYS | 8 | -4.681 | 3.317  | -2.988 | / | ATOM 118 | CA   | LYS | 8 | -5.410 | 1.686  | -4.189 |
| ATOM 119 | HA   | LYS | 8 | -6.470 | 1.437  | -4.146 | / | ATOM 120 | CB   | LYS | 8 | -5.129 | 2.581  | -5.416 |
| ATOM 121 | HB2  | LYS | 8 | -4.669 | 3.518  | -5.117 | / | ATOM 122 | HB1  | LYS | 8 | -4.416 | 2.079  | -6.069 |
| ATOM 123 | CG   | LYS | 8 | -6.376 | 2.861  | -6.260 | / | ATOM 124 | HG2  | LYS | 8 | -6.053 | 3.242  | -7.230 |
| ATOM 125 | HG1  | LYS | 8 | -6.893 | 1.917  | -6.440 | / | ATOM 126 | CD   | LYS | 8 | -7.354 | 3.856  | -5.612 |
| ATOM 127 | HD2  | LYS | 8 | -8.351 | 3.415  | -5.642 | / | ATOM 128 | HD1  | LYS | 8 | -7.100 | 4.027  | -4.564 |
| ATOM 129 | CE   | LYS | 8 | -7.402 | 5.188  | -6.374 | / | ATOM 130 | HE2  | LYS | 8 | -7.387 | 4.981  | -7.448 |
| ATOM 131 | HE1  | LYS | 8 | -8.346 | 5.686  | -6.140 | / | ATOM 132 | NZ   | LYS | 8 | -6.269 | 6.068  | -6.013 |

|          |      |     |    |        |        |        |   |          |      |     |    |        |        |        |
|----------|------|-----|----|--------|--------|--------|---|----------|------|-----|----|--------|--------|--------|
| ATOM 133 | HZ1  | LYS | 8  | -6.230 | 6.185  | -5.001 | / | ATOM 134 | HZ2  | LYS | 8  | -5.390 | 5.633  | -6.256 |
| ATOM 135 | HZ3  | LYS | 8  | -6.340 | 6.967  | -6.470 | / | ATOM 136 | C    | LYS | 8  | -4.667 | 0.361  | -4.348 |
| ATOM 137 | O    | LYS | 8  | -5.265 | -0.659 | -4.680 | / | ATOM 138 | N    | ASP | 9  | -3.371 | 0.378  | -4.054 |
| ATOM 139 | HN   | ASP | 9  | -2.967 | 1.285  | -3.830 | / | ATOM 140 | CA   | ASP | 9  | -2.453 | -0.735 | -4.249 |
| ATOM 141 | HA   | ASP | 9  | -2.821 | -1.362 | -5.063 | / | ATOM 142 | CB   | ASP | 9  | -1.095 | -0.164 | -4.675 |
| ATOM 143 | HB2  | ASP | 9  | -0.700 | 0.408  | -3.834 | / | ATOM 144 | HB1  | ASP | 9  | -0.438 | -1.018 | -4.849 |
| ATOM 145 | CG   | ASP | 9  | -1.033 | 0.731  | -5.938 | / | ATOM 146 | OD1  | ASP | 9  | 0.117  | 0.964  | -6.381 |
| ATOM 147 | OD2  | ASP | 9  | -2.068 | 1.219  | -6.449 | / | ATOM 148 | C    | ASP | 9  | -2.375 | -1.619 | -2.977 |
| ATOM 149 | O    | ASP | 9  | -1.293 | -2.052 | -2.555 | / | ATOM 150 | N    | GLY | 10 | -3.551 | -1.857 | -2.368 |
| ATOM 151 | HN   | GLY | 10 | -4.358 | -1.420 | -2.802 | / | ATOM 152 | CA   | GLY | 10 | -3.804 | -2.737 | -1.224 |
| ATOM 153 | HA2  | GLY | 10 | -4.879 | -2.911 | -1.161 | / | ATOM 154 | HA1  | GLY | 10 | -3.334 | -3.698 | -1.401 |
| ATOM 155 | C    | GLY | 10 | -3.355 | -2.193 | 0.138  | / | ATOM 156 | O    | GLY | 10 | -3.122 | -2.970 | 1.067  |
| ATOM 157 | N    | GLY | 11 | -3.227 | -0.869 | 0.270  | / | ATOM 158 | HN   | GLY | 11 | -3.376 | -0.298 | -0.555 |
| ATOM 159 | CA   | GLY | 11 | -2.737 | -0.203 | 1.473  | / | ATOM 160 | HA2  | GLY | 11 | -2.689 | 0.869  | 1.297  |
| ATOM 161 | HA1  | GLY | 11 | -3.437 | -0.378 | 2.287  | / | ATOM 162 | C    | GLY | 11 | -1.324 | -0.680 | 1.833  |
| ATOM 163 | O    | GLY | 11 | -0.408 | -0.522 | 1.025  | / | ATOM 164 | N    | PRO | 12 | -1.114 | -1.294 | 3.014  |
| ATOM 165 | CD   | PRO | 12 | -2.097 | -1.577 | 4.052  | / | ATOM 166 | HD2  | PRO | 12 | -2.930 | -2.161 | 3.658  |
| ATOM 167 | HD1  | PRO | 12 | -2.465 | -0.642 | 4.475  | / | ATOM 168 | CG   | PRO | 12 | -1.363 | -2.380 | 5.127  |
| ATOM 169 | HG2  | PRO | 12 | -1.500 | -3.447 | 4.946  | / | ATOM 170 | HG1  | PRO | 12 | -1.705 | -2.114 | 6.128  |
| ATOM 171 | CB   | PRO | 12 | 0.104  | -2.007 | 4.919  | / | ATOM 172 | HB2  | PRO | 12 | 0.776  | -2.794 | 5.264  |
| ATOM 173 | HB1  | PRO | 12 | 0.316  | -1.077 | 5.447  | / | ATOM 174 | CA   | PRO | 12 | 0.206  | -1.768 | 3.409  |
| ATOM 175 | HA   | PRO | 12 | 0.947  | -0.990 | 3.226  | / | ATOM 176 | C    | PRO | 12 | 0.658  | -3.027 | 2.649  |
| ATOM 177 | O    | PRO | 12 | 1.840  | -3.362 | 2.719  | / | ATOM 178 | N    | SER | 13 | -0.226 | -3.715 | 1.902  |
| ATOM 179 | HN   | SER | 13 | -1.179 | -3.375 | 1.806  | / | ATOM 180 | CA   | SER | 13 | 0.123  | -4.976 | 1.229  |
| ATOM 181 | HA   | SER | 13 | 0.476  | -5.670 | 1.992  | / | ATOM 182 | CB   | SER | 13 | -1.100 | -5.615 | 0.565  |
| ATOM 183 | HB2  | SER | 13 | -0.875 | -6.658 | 0.338  | / | ATOM 184 | HB1  | SER | 13 | -1.955 | -5.575 | 1.241  |
| ATOM 185 | OG   | SER | 13 | -1.405 | -4.951 | -0.640 | / | ATOM 186 | HG   | SER | 13 | -2.155 | -5.383 | -1.055 |
| ATOM 187 | C    | SER | 13 | 1.247  | -4.833 | 0.195  | / | ATOM 188 | O    | SER | 13 | 2.009  | -5.779 | 0.006  |
| ATOM 189 | N    | SER | 14 | 1.398  | -3.656 | -0.435 | / | ATOM 190 | HN   | SER | 14 | 0.720  | -2.928 | -0.249 |
| ATOM 191 | CA   | SER | 14 | 2.514  | -3.382 | -1.347 | / | ATOM 192 | HA   | SER | 14 | 2.661  | -4.281 | -1.947 |
| ATOM 193 | CB   | SER | 14 | 2.209  | -2.258 | -2.362 | / | ATOM 194 | HB2  | SER | 14 | 3.128  | -1.700 | -2.544 |
| ATOM 195 | HB1  | SER | 14 | 1.929  | -2.719 | -3.309 | / | ATOM 196 | OG   | SER | 14 | 1.199  | -1.319 | -2.013 |
| ATOM 197 | HG   | SER | 14 | 0.297  | -1.715 | -2.122 | / | ATOM 198 | C    | SER | 14 | 3.864  | -3.162 | -0.634 |
| ATOM 199 | O    | SER | 14 | 4.873  | -2.994 | -1.316 | / | ATOM 200 | N    | GLY | 15 | 3.926  | -3.184 | 0.708  |
| ATOM 201 | HN   | GLY | 15 | 3.070  | -3.335 | 1.238  | / | ATOM 202 | CA   | GLY | 15 | 5.189  | -3.215 | 1.460  |
| ATOM 203 | HA2  | GLY | 15 | 4.974  | -3.490 | 2.492  | / | ATOM 204 | HA1  | GLY | 15 | 5.838  | -3.984 | 1.038  |
| ATOM 205 | C    | GLY | 15 | 5.967  | -1.894 | 1.482  | / | ATOM 206 | O    | GLY | 15 | 7.164  | -1.894 | 1.760  |
| ATOM 207 | N    | ARG | 16 | 5.296  | -0.772 | 1.193  | / | ATOM 208 | HN   | ARG | 16 | 4.307  | -0.885 | 1.027  |
| ATOM 209 | CA   | ARG | 16 | 5.866  | 0.584  | 1.152  | / | ATOM 210 | HA   | ARG | 16 | 6.949  | 0.482  | 1.167  |
| ATOM 211 | CB   | ARG | 16 | 5.510  | 1.315  | -0.157 | / | ATOM 212 | HB2  | ARG | 16 | 5.537  | 2.393  | 0.015  |
| ATOM 213 | HB1  | ARG | 16 | 6.269  | 1.078  | -0.904 | / | ATOM 214 | CG   | ARG | 16 | 4.142  | 0.927  | -0.729 |
| ATOM 215 | HG2  | ARG | 16 | 4.207  | -0.104 | -1.082 | / | ATOM 216 | HG1  | ARG | 16 | 3.371  | 0.989  | 0.039  |
| ATOM 217 | CD   | ARG | 16 | 3.750  | 1.811  | -1.908 | / | ATOM 218 | HD2  | ARG | 16 | 3.367  | 2.766  | -1.549 |
| ATOM 219 | HD1  | ARG | 16 | 4.629  | 1.986  | -2.531 | / | ATOM 220 | NE   | ARG | 16 | 2.731  | 1.112  | -2.691 |
| ATOM 221 | HE   | ARG | 16 | 2.227  | 0.354  | -2.233 | / | ATOM 222 | CZ   | ARG | 16 | 2.526  | 1.201  | -3.990 |
| ATOM 223 | NH1  | ARG | 16 | 2.959  | 2.188  | -4.735 | / | ATOM 224 | HH11 | ARG | 16 | 3.473  | 2.939  | -4.316 |
| ATOM 225 | HH12 | ARG | 16 | 2.727  | 2.177  | -5.715 | / | ATOM 226 | NH2  | ARG | 16 | 1.855  | 0.250  | -4.560 |
| ATOM 227 | HH21 | ARG | 16 | 1.463  | -0.467 | -3.968 | / | ATOM 228 | HH22 | ARG | 16 | 1.369  | 0.469  | -5.445 |
| ATOM 229 | C    | ARG | 16 | 5.419  | 1.411  | 2.368  | / | ATOM 230 | O    | ARG | 16 | 4.230  | 1.379  | 2.700  |
| ATOM 231 | N    | PRO | 17 | 6.328  | 2.183  | 3.001  | / | ATOM 232 | CD   | PRO | 17 | 7.762  | 2.227  | 2.735  |
| ATOM 233 | HD2  | PRO | 17 | 7.944  | 2.799  | 1.824  | / | ATOM 234 | HD1  | PRO | 17 | 8.190  | 1.228  | 2.649  |
| ATOM 235 | CG   | PRO | 17 | 8.389  | 2.939  | 3.929  | / | ATOM 236 | HG2  | PRO | 17 | 9.300  | 3.469  | 3.649  |
| ATOM 237 | HG1  | PRO | 17 | 8.592  | 2.214  | 4.719  | / | ATOM 238 | CB   | PRO | 17 | 7.283  | 3.892  | 4.372  |
| ATOM 239 | HB2  | PRO | 17 | 7.335  | 4.799  | 3.767  | / | ATOM 240 | HB1  | PRO | 17 | 7.371  | 4.139  | 5.431  |
| ATOM 241 | CA   | PRO | 17 | 5.991  | 3.117  | 4.075  | / | ATOM 242 | HA   | PRO | 17 | 5.737  | 2.523  | 4.950  |
| ATOM 243 | C    | PRO | 17 | 4.838  | 4.071  | 3.690  | / | ATOM 244 | O    | PRO | 17 | 4.922  | 4.705  | 2.635  |
| ATOM 245 | N    | PRO | 18 | 3.765  | 4.190  | 4.500  | / | ATOM 246 | CD   | PRO | 18 | 3.473  | 3.386  | 5.676  |
| ATOM 247 | HD2  | PRO | 18 | 4.335  | 3.305  | 6.337  | / | ATOM 248 | HD1  | PRO | 18 | 3.146  | 2.395  | 5.356  |
| ATOM 249 | CG   | PRO | 18 | 2.335  | 4.098  | 6.401  | / | ATOM 250 | HG2  | PRO | 18 | 2.754  | 4.814  | 7.109  |
| ATOM 251 | HG1  | PRO | 18 | 1.682  | 3.390  | 6.912  | / | ATOM 252 | CB   | PRO | 18 | 1.598  | 4.849  | 5.293  |
| ATOM 253 | HB2  | PRO | 18 | 1.142  | 5.764  | 5.672  | / | ATOM 254 | HB1  | PRO | 18 | 0.829  | 4.209  | 4.865  |
| ATOM 255 | CA   | PRO | 18 | 2.674  | 5.131  | 4.239  | / | ATOM 256 | HA   | PRO | 18 | 2.259  | 4.904  | 3.260  |
| ATOM 257 | C    | PRO | 18 | 3.158  | 6.596  | 4.298  | / | ATOM 258 | O    | PRO | 18 | 3.839  | 6.967  | 5.255  |
| ATOM 259 | N    | PRO | 19 | 2.822  | 7.439  | 3.301  | / | ATOM 260 | CD   | PRO | 19 | 2.097  | 7.083  | 2.087  |
| ATOM 261 | HD2  | PRO | 19 | 1.094  | 6.723  | 2.320  | / | ATOM 262 | HD1  | PRO | 19 | 2.656  | 6.320  | 1.542  |
| ATOM 263 | CG   | PRO | 19 | 2.015  | 8.352  | 1.240  | / | ATOM 264 | HG2  | PRO | 19 | 1.072  | 8.864  | 1.432  |
| ATOM 265 | HG1  | PRO | 19 | 2.118  | 8.126  | 0.179  | / | ATOM 266 | CB   | PRO | 19 | 3.184  | 9.195  | 1.754  |
| ATOM 267 | HB2  | PRO | 19 | 3.028  | 10.261 | 1.586  | / | ATOM 268 | HB1  | PRO | 19 | 4.105  | 8.870  | 1.268  |
| ATOM 269 | CA   | PRO | 19 | 3.248  | 8.837  | 3.244  | / | ATOM 270 | HA   | PRO | 19 | 4.280  | 8.932  | 3.586  |
| ATOM 271 | C    | PRO | 19 | 2.357  | 9.737  | 4.121  | / | ATOM 272 | O    | PRO | 19 | 1.366  | 10.290 | 3.643  |
| ATOM 273 | N    | SER | 20 | 2.714  | 9.886  | 5.401  | / | ATOM 274 | HN   | SER | 20 | 3.528  | 9.395  | 5.746  |
| ATOM 275 | CA   | SER | 20 | 2.018  | 10.714 | 6.402  | / | ATOM 276 | HA   | SER | 20 | 1.288  | 11.345 | 5.899  |
| ATOM 277 | CB   | SER | 20 | 1.257  | 9.822  | 7.387  | / | ATOM 278 | HB2  | SER | 20 | 0.815  | 10.450 | 8.164  |
| ATOM 279 | HB1  | SER | 20 | 0.455  | 9.310  | 6.854  | / | ATOM 280 | OG   | SER | 20 | 2.116  | 8.859  | 7.974  |
| ATOM 281 | HG   | SER | 20 | 1.700  | 8.498  | 8.759  | / | ATOM 282 | C    | SER | 20 | 2.944  | 11.687 | 7.140  |
| ATOM 283 | OT1  | SER | 20 | 4.173  | 11.619 | 6.935  | / | ATOM 284 | OT2  | SER | 20 | 2.373  | 12.520 | 7.886  |

END



Detailed assignments for four Trp-cage constructs. All assignment at pH 7, 280K:  $\alpha$ -  $\beta$ - and  $\delta$ -CH<sub>2</sub> shifts shown in bold are stereospecifically assigned.

a) **TC10b**

| Residue       | HN                | H $\alpha$ ( $\alpha$ 2, $\alpha$ 3) <sup>a</sup> | H $\beta$ 2, H $\beta$ 3 <sup>a</sup> | Others <sup>b</sup>                                                                                         |
|---------------|-------------------|---------------------------------------------------|---------------------------------------|-------------------------------------------------------------------------------------------------------------|
| <b>Asp 1</b>  | Exch <sup>c</sup> | 4.245                                             | 3.138, 2.963                          |                                                                                                             |
| <b>Ala 2</b>  | Exch              | 4.277                                             | 1.516                                 |                                                                                                             |
| <b>Tyr 3</b>  | 8.899             | 4.028                                             | 3.136 (both)                          | $\delta$ 7.106; $\epsilon$ 6.827                                                                            |
| <b>Ala 4</b>  | 8.348             | 4.120                                             | 1.578                                 |                                                                                                             |
| <b>Gln 5</b>  | 8.126             | 3.903                                             | 2.235, 2.155                          | $\gamma$ , $\gamma'$ 2.454, 2.384; $\delta$ NH2 7.915, 7.068                                                |
| <b>Trp 6</b>  | 8.150             | 4.237                                             | <b>3.138, 3.558</b>                   | $\epsilon$ 1 9.720; $\delta$ 1 6.987; $\epsilon$ 3 6.983;<br>$\zeta$ 3 7.133; $\eta$ 7.223; $\zeta$ 2 7.187 |
| <b>Leu 7</b>  | 8.369             | 3.387                                             | <b>1.901, 1.363</b>                   | $\gamma$ 1.635; $\delta$ 2, $\delta$ 3 0.866, 0.995                                                         |
| <b>Lys 8</b>  | 8.117             | 3.934                                             | <b>1.975, 1.900</b>                   | $\gamma$ 2, $\gamma$ 3 1.513; $\delta$ 2, $\delta$ 3 1.656; $\epsilon$ 2, $\epsilon$ 3 2.972                |
| <b>Asp 9</b>  | 8.004             | 4.512                                             | <b>2.726, 2.910</b>                   |                                                                                                             |
| <b>Gly 10</b> | 7.513             | <b>3.454, 4.172</b>                               |                                       |                                                                                                             |
| <b>Gly 11</b> | 8.507             | <b>0.647, 3.128</b>                               |                                       |                                                                                                             |
| <b>Pro 12</b> | --                | 4.649                                             | <b>2.080, 2.541</b>                   | $\gamma$ 2, $\gamma$ 3 2.176; $\delta$ 2, $\delta$ 3 <b>3.842, 3.480</b>                                    |
| <b>Ser 13</b> | 7.732             | 4.486                                             | 3.925 (both)                          |                                                                                                             |
| <b>Ser 14</b> | 8.256             | 4.134                                             | <b>3.844, 3.465</b>                   |                                                                                                             |
| <b>Gly 15</b> | 7.984             | <b>3.795, 4.296</b>                               |                                       |                                                                                                             |
| <b>Arg 16</b> | 8.177             | 5.086                                             | 1.918, 1.810                          | $\gamma$ , $\gamma'$ 1.810, 1.652; $\delta$ , $\delta'$ 3.312, 3.222;<br>$\epsilon$ 7.748                   |
| <b>Pro 17</b> | --                | 4.771                                             | <b>1.785, 2.365</b>                   | $\gamma$ 2, $\gamma$ 3 1.997; $\delta$ 2, $\delta$ 3 <b>3.678, 3.888</b>                                    |
| <b>Pro 18</b> | --                | 2.401                                             | <b>1.312, 0.213</b>                   | $\gamma$ 2, $\gamma$ 3 1.657, 1.718; $\delta$ 2, $\delta$ 3 3.518                                           |
| <b>Pro 19</b> | --                | 4.343                                             | <b>1.997, 2.213</b>                   | $\gamma$ 2, $\gamma$ 3 1.788, 1.853; $\delta$ 2, $\delta$ 3 <b>2.936, 3.151</b>                             |
| <b>Ser 20</b> | 7.968             | 4.162                                             | 3.783 (both)                          |                                                                                                             |

b) **(P18A)-TC10b**

|               |       |                     |                     |                                                                                                             |
|---------------|-------|---------------------|---------------------|-------------------------------------------------------------------------------------------------------------|
| <b>Asp 1</b>  | Exch  | 4.256               | 3.146, 2.965        |                                                                                                             |
| <b>Ala 2</b>  | Exch  | 4.269               | 1.514               |                                                                                                             |
| <b>Tyr 3</b>  | 8.917 | 4.025               | 3.125 (both)        | $\delta$ 7.110; $\epsilon$ 6.829                                                                            |
| <b>Ala 4</b>  | 8.357 | 4.101               | 1.571               |                                                                                                             |
| <b>Gln 5</b>  | 8.108 | 3.892               | 2.234, 2.143        | $\gamma$ , $\gamma'$ 2.450, 2.376; $\delta$ NH2 7.908, 7.067                                                |
| <b>Trp 6</b>  | 8.166 | 4.230               | <b>3.101, 3.561</b> | $\epsilon$ 1 9.754; $\delta$ 1 6.945; $\epsilon$ 3 6.973;<br>$\zeta$ 3 7.112; $\eta$ 7.224; $\zeta$ 2 7.210 |
| <b>Leu 7</b>  | 8.366 | 3.389               | <b>1.879, 1.354</b> | $\gamma$ 1.617; $\delta$ 2, $\delta$ 3 0.856, 0.978                                                         |
| <b>Lys 8</b>  | 8.084 | 3.929               | <b>1.973, 1.888</b> | $\gamma$ 2, $\gamma$ 3 1.497; $\delta$ 2, $\delta$ 3 1.661; $\epsilon$ 2, $\epsilon$ 3 2.967                |
| <b>Asp 9</b>  | 7.997 | 4.505               | <b>2.722, 2.927</b> |                                                                                                             |
| <b>Gly 10</b> | 7.511 | <b>3.445, 4.158</b> |                     |                                                                                                             |
| <b>Gly 11</b> | 8.536 | <b>0.613, 3.139</b> |                     |                                                                                                             |
| <b>Pro 12</b> | --    | 4.649               | <b>2.074, 2.554</b> | $\gamma$ 2, $\gamma$ 3 2.175; $\delta$ 2, $\delta$ 3 <b>3.838, 3.498</b>                                    |
| <b>Ser 13</b> | 7.704 | 4.487               | 3.920 (both)        |                                                                                                             |
| <b>Ser 14</b> | 8.269 | 4.114               | <b>3.835, 3.453</b> |                                                                                                             |
| <b>Gly 15</b> | 7.994 | <b>3.773, 4.290</b> |                     |                                                                                                             |
| <b>Arg 16</b> | 8.173 | 5.081               | 1.913, 1.794        | $\gamma$ 2, $\gamma$ 3 1.611; $\delta$ , $\delta'$ 3.298, 3.213; $\epsilon$ 7.760                           |
| <b>Pro 17</b> | --    | 4.508               | <b>1.760, 2.259</b> | $\gamma$ 2, $\gamma$ 3 1.955; $\delta$ 2, $\delta$ 3 <b>3.649, 3.841</b>                                    |
| <b>Ala 18</b> | 8.346 | 1.988               | 0.303               |                                                                                                             |
| <b>Pro 19</b> | --    | 4.328               | <b>1.970, 2.213</b> | $\gamma$ 2, $\gamma$ 3 1.798; $\delta$ 2, $\delta$ 3 <b>2.844, 3.140</b>                                    |
| <b>Ser 20</b> | 7.959 | 4.159               | 3.768 (both)        |                                                                                                             |

c) (R16Nva)-TC9b

|        |       |                     |                     |                                                                                                             |
|--------|-------|---------------------|---------------------|-------------------------------------------------------------------------------------------------------------|
| Asn 1  | Exch  | 4.135               | 3.136, 3.020        | $\gamma$ NH2 7.937, 7.142                                                                                   |
| Ala 2  | Exch  | 4.259               | 1.478               |                                                                                                             |
| Tyr 3  | 8.792 | 4.100               | 3.089 (both)        | $\delta$ 7.080; $\epsilon$ 6.817                                                                            |
| Ala 4  | 8.310 | 4.104               | 1.518               |                                                                                                             |
| Gln 5  | 8.110 | 3.939               | 2.424, 2.173        | $\gamma$ 2, $\gamma$ 3 2.173; $\delta$ NH2 7.959, 6.999                                                     |
| Trp 6  | 8.151 | 4.348               | <b>3.196, 3.510</b> | $\epsilon$ 1 9.663; $\delta$ 1 7.150; $\epsilon$ 3 7.089;<br>$\zeta$ 3 7.207; $\eta$ 7.258; $\zeta$ 2 7.266 |
| Leu 7  | 8.322 | 3.443               | <b>1.781, 1.425</b> | $\gamma$ 1.581; $\delta$ 2, $\delta$ 3 0.852, 0.945                                                         |
| Lys 8  | 8.014 | 3.961               | <b>1.942, 1.888</b> | $\gamma$ 2, $\gamma$ 3 1.472; $\delta$ 2, $\delta$ 3 1.654; $\epsilon$ 2, $\epsilon$ 3 2.967                |
| Asp 9  | 8.064 | 4.568               | <b>2.692, 2.814</b> |                                                                                                             |
| Gly 10 | 7.576 | <b>3.541, 4.152</b> |                     |                                                                                                             |
| Gly 11 | 8.218 | <b>1.591, 3.023</b> |                     |                                                                                                             |
| Pro 12 | --    | 4.541               | <b>2.042, 2.473</b> | $\gamma$ 2, $\gamma$ 3 2.103; $\delta$ 2, $\delta$ 3 <b>3.691, 3.207</b>                                    |
| Ser 13 | 7.971 | 4.421               | 3.921 (both)        |                                                                                                             |
| Ser 14 | 8.153 | 4.310               | <b>3.940, 3.684</b> |                                                                                                             |
| Gly 15 | 8.015 | <b>3.869, 4.208</b> |                     |                                                                                                             |
| Nva 16 | 8.012 | 4.745               | 1.835, 1.734        | $\gamma$ 2, $\gamma$ 3 1.435; $\delta$ 0.970                                                                |
| Pro 17 | --    | 4.622               | <b>1.765, 2.200</b> | $\gamma$ 2, $\gamma$ 3 2.003; $\delta$ 2, $\delta$ 3 <b>3.668, 3.865</b>                                    |
| Pro 18 | --    | 2.909               | <b>1.435, 0.790</b> | $\gamma$ 2, $\gamma$ 3 1.736, 1.788; $\delta$ 2, $\delta$ 3 3.494, 3.534                                    |
| Pro 19 | --    | 4.352               | <b>1.946, 2.235</b> | $\gamma$ 2, $\gamma$ 3 1.851; $\delta$ 2, $\delta$ 3 <b>3.006, 3.215</b>                                    |
| Ser 20 | 8.023 | 4.175               | 3.789 (both)        |                                                                                                             |

d) (S14T)-TC9b

|        |       |                     |                     |                                                                                                             |
|--------|-------|---------------------|---------------------|-------------------------------------------------------------------------------------------------------------|
| Asn 1  | Exch  | 4.141               | 3.188, 3.045        | $\gamma$ NH2 7.957, 7.159                                                                                   |
| Ala 2  | Exch  | 4.261               | 1.504               |                                                                                                             |
| Tyr 3  | 8.949 | 4.028               | 3.089 (both)        | $\delta$ 7.088; $\epsilon$ 6.817                                                                            |
| Ala 4  | 8.360 | 4.101               | 1.552               |                                                                                                             |
| Gln 5  | 8.112 | 3.927               | 2.188 (both)        | $\gamma$ 2, $\gamma$ 3 2.441; $\delta$ NH2 8.007, 7.037                                                     |
| Trp 6  | 8.133 | 4.267               | <b>3.169, 3.549</b> | $\epsilon$ 1 9.464; $\delta$ 1 7.122; $\epsilon$ 3 7.071;<br>$\zeta$ 3 7.089; $\eta$ 7.238; $\zeta$ 2 7.208 |
| Leu 7  | 8.408 | 3.395               | <b>1.794, 1.446</b> | $\gamma$ 1.576; $\delta$ 2, $\delta$ 3 0.916, 0.963                                                         |
| Lys 8  | 8.113 | 3.916               | <b>1.956, 1.893</b> | $\gamma$ 2, $\gamma$ 3 1.479; $\delta$ 2, $\delta$ 3 1.667; $\epsilon$ 2, $\epsilon$ 3 2.969                |
| Asp 9  | 8.213 | 4.405               | <b>2.707, 2.707</b> |                                                                                                             |
| Gly 10 | 7.437 | <b>3.494, 4.260</b> |                     |                                                                                                             |
| Gly 11 | 8.512 | <b>0.801, 3.156</b> |                     |                                                                                                             |
| Pro 12 | --    | 4.610               | <b>2.055, 2.507</b> | $\gamma$ 2, $\gamma$ 3 2.181; $\delta$ 2, $\delta$ 3 <b>3.489, 3.814</b>                                    |
| Ser 13 | 7.783 | 4.300               | 3.920 (both)        |                                                                                                             |
| Thr 14 | 8.099 | 4.133               | 4.239               | $\gamma$ 1.069; OH $\gamma$ 5.009                                                                           |
| Gly 15 | 7.972 | <b>3.876, 4.197</b> |                     |                                                                                                             |
| Arg 16 | 8.287 | 4.921               | 1.890, 1.716        | $\gamma$ , $\gamma'$ 1.695, 1.644; $\delta$ , $\delta'$ 3.358, 3.262;<br>$\epsilon$ 7.561                   |
| Pro 17 | --    | 4.667               | <b>1.760, 2.280</b> | $\gamma$ 2, $\gamma$ 3 2.000; $\delta$ 2, $\delta$ 3 <b>3.661, 3.868</b>                                    |
| Pro 18 | --    | 2.496               | <b>0.538, 1.383</b> | $\gamma$ 2, $\gamma$ 3 1.701, 1.803; $\delta$ 2, $\delta$ 3 3.483                                           |
| Pro 19 | --    | 4.346               | <b>1.914, 2.238</b> | $\gamma$ 2, $\gamma$ 3 1.845; $\delta$ 2, $\delta$ 3 <b>2.926, 3.163</b>                                    |
| Ser 20 | 8.011 | 4.171               | 3.782 (both)        |                                                                                                             |

(a) If the entry is bold, then the atoms are diastereotopically assigned and the first number is the lower IUPAC number (i.e.  $\alpha$ 2 or  $\beta$ 2). (b) Entries are diastereotopically assigned if noted by IUPAC numbering. (c) 'Exch' indicates unable to assign due to H<sub>N</sub> exchange with solvent.

## References

- Fesinmeyer,R.M., Hudson,F.M. and Andersen,N.H. (2004) *J. Am. Chem. Soc.*, 126, 7238-7243.
- Fesinmeyer,R.M. (2005) Chemical Shifts Define the Structure and Folding Thermodynamics of Polypeptides, Ph. D. thesis, Chemistry Dept., University of Washington.
- Lin,J.C., Barua,B. and Andersen,N.H. (2004) *J. Am. Chem. Soc.*, 126, 13679-13684.
- Markley,J.L., Bax,A., Arata,Y., Hilbers,C.W., Kaptein,R., Sykes,B.D., Wright,P.E. and Wuthrich,K. (1998) *Pure Appl. Chem.*, **70**, 117-142.
- Naduthambi,D. and Zondlo,N.J. (2006) *J. Am. Chem. Soc.*, 128, 12430-12431.
